# Supplementary material for: KTCNlncDB—a first platform to investigate lncRNAs expressed in human keratoconus and non-keratoconus corneas
Source: Oxford University Press journal article supplement (doi:10.1093/database/baw168), 2016-12-15
Supplement: baw168_Supp.xlsx [file baw168_Supp.xlsx]

## Sheet: Sheet1
	#Newly discovered transcripts have names starting with TCONS.
	General information on transcript predicted to interact with a lncRNA					Regulatory mechanisms assigned to this transcript	Differential expression data for a transcript
#	lncRNA TARGET	GENE ID	GENE NAME	GENOMIC LOCATION	GENE DESCRIPTION	MECHANISMS	FOLD CHANGE	ADJUSTED P-VALUE	EXPRESSION CHANGE
1	ENST00000274276	ENSG00000145623	OSMR	chr5:38845998-38935641(+)	oncostatin M receptor	SMD, miRNA	3.84	3.87138e-22	downregulated
2	TCONS_00090805	ENSG00000087253	LPCAT2	chr16:55478829-55586670(+)	lysophosphatidylcholine acyltransferase 2	SMD	4.67	1.34312e-21	downregulated
3	ENST00000615519	ENSG00000154511	FAM69A	chr1:92832736-92961522(-)	family with sequence similarity 69, member A	splicing	1.49	3.67405e-06	downregulated
4	TCONS_00097031	ENSG00000261092	RP11-21B23.2	chr16:50387718-50397279(-)		splicing	1.58	6.9148e-05	upregulated
5	TCONS_00075009	ENSG00000072110	ACTN1	chr14:68867659-68979440(-)	actinin, alpha 1	SMD	4.45	1.6693e-12	downregulated
6	TCONS_00214410	ENSG00000216915	RP1-97D16.1	chr6:27703101-27751034(-)		editing	2.2	0.000683906	upregulated
7	TCONS_00041296	ENSG00000166405	RIC3	chr11:8090002-8169055(-)	RIC3 acetylcholine receptor chaperone	editing	1.58	1.63967e-06	upregulated
8	TCONS_00149979	ENSG00000229089	ANKRD20A8P	chr2:94755320-94947341(-)	ankyrin repeat domain 20 family, member A8, pseudogene	SMD	2.57	2.62788e-05	upregulated
9	ENST00000375290	ENSG00000185920	PTCH1	chr9:95443411-95506599(-)	patched 1	SMD, editing	1.62	0.000141173	upregulated
10	ENST00000597488	ENSG00000269609	RPARP-AS1	chr10:102451601-102453539(+)	RPARP antisense RNA 1	editing	1.51	1.63107e-05	upregulated
11	ENST00000534514	ENSG00000007933	FMO3	chr1:171090904-171100735(+)	flavin containing monooxygenase 3	splicing	4.42	3.39878e-22	downregulated
12	TCONS_00041298	ENSG00000166405	RIC3	chr11:8090002-8169055(-)	RIC3 acetylcholine receptor chaperone	editing	1.58	1.63967e-06	upregulated
13	TCONS_00149970	ENSG00000223564	CYP4F32P	chr2:94755320-94767930(-)	cytochrome P450, family 4, subfamily F, polypeptide 32, pseudogene	SMD	2.53	1.68408e-05	upregulated
14	TCONS_00150689	ENSG00000135960	EDAR	chr2:108914079-108989394(-)	ectodysplasin A receptor	editing	3.15	5.52024e-08	downregulated
15	ENST00000523000	ENSG00000186106	ANKRD46	chr8:100529576-100559751(-)	ankyrin repeat domain 46	splicing	1.59	9.49329e-09	upregulated
16	TCONS_00150045	ENSG00000174501	ANKRD36C	chr2:95806338-95992227(-)	ankyrin repeat domain 36C	SMD, editing, miRNA	2.01	3.09965e-22	downregulated
17	ENST00000296498	ENSG00000164099	PRSS12	chr4:118280037-118353003(-)	protease, serine, 12 (neurotrypsin, motopsin)	splicing, miRNA	3.73	7.20204e-06	downregulated
18	TCONS_00235708	ENSG00000164830	OXR1	chr8:106695430-106762632(+)	oxidation resistance 1	SMD, editing	1.61	6.8e-05	upregulated
19	TCONS_00165341	ENSG00000235954	TTC28-AS1	chr22:27919375-27990621(+)	TTC28 antisense RNA 1	editing	1.5	0.000804529	upregulated
20	ENST00000604000	ENSG00000271601	LIX1L	chr1:145933422-145958001(-)	Lix1 homolog (chicken) like	SMD, editing	2.57	3.83543e-09	downregulated
21	TCONS_00061168	ENSG00000111647	UHRF1BP1L	chr12:100030830-100142868(-)	UHRF1 binding protein 1-like	SMD, editing	1.39	2.52938e-06	downregulated
22	ENST00000450928	ENSG00000231355	AP000302.58	chr21:33482498-33484258(-)		splicing	1.81	0.00109866	upregulated
23	ENST00000378004	ENSG00000145819	ARHGAP26	chr5:142770406-143229011(+)	Rho GTPase activating protein 26	SMD, editing, miRNA	3.39	1.40722e-17	downregulated
24	ENST00000367097	ENSG00000130338	TULP4	chr6:158312487-158511828(+)	tubby like protein 4	SMD	1.55	1.61644e-06	upregulated
25	ENST00000430298	ENSG00000214189	ZNF788	chr19:12092262-12114851(+)	zinc finger family member 788	SMD	1.79	2.17878e-12	downregulated
26	ENST00000374574	ENSG00000204217	BMPR2	chr2:202377433-202567751(+)	bone morphogenetic protein receptor, type II (serine/threonine kinase)	SMD, editing	1.58	5.1875e-06	downregulated
27	ENST00000261596	ENSG00000101577	LPIN2	chr18:2916993-3011947(-)	lipin 2	splicing	2.4	3.11849e-08	downregulated
28	TCONS_00160924	ENSG00000101213	PTK6	chr20:63521262-63537384(-)	protein tyrosine kinase 6	editing, SMD	1.53	0.000102848	upregulated
29	TCONS_00239255	ENSG00000076554	TPD52	chr8:79931007-80094404(-)	tumor protein D52	editing	1.6	4.70118e-07	upregulated
30	ENST00000432372	ENSG00000099250	NRP1	chr10:33211409-33335078(-)	neuropilin 1	SMD	4.24	3.34751e-60	downregulated
31	TCONS_00191796	ENSG00000152990	GPR125	chr4:22384483-22434164(-)	G protein-coupled receptor 125	editing	1.77	1.00196e-05	downregulated
32	TCONS_00140729	ENSG00000071051	NCK2	chr2:105744896-105909677(+)	NCK adaptor protein 2	splicing	1.4	4.51385e-05	upregulated
33	TCONS_00090939	ENSG00000102900	NUP93	chr16:56767488-56850286(+)	nucleoporin 93kDa	SMD, editing	1.64	1.19592e-06	upregulated
34	TCONS_00184373	ENSG00000144959	NCEH1	chr3:172628239-172713947(-)	neutral cholesterol ester hydrolase 1	SMD, editing	2.26	3.34339e-12	upregulated
35	TCONS_00116327	ENSG00000168675	LDLRAD4	chr18:13217497-13473627(+)	low density lipoprotein receptor class A domain containing 4	editing	5.54	8.30378e-29	downregulated
36	TCONS_00165715	ENSG00000182541	LIMK2	chr22:31212238-31276497(+)	LIM domain kinase 2	SMD	1.48	9.57559e-08	downregulated
37	TCONS_00213182	ENSG00000130338	TULP4	chr6:158232224-158348958(+)	tubby like protein 4	editing	1.55	1.61644e-06	upregulated
38	TCONS_00203947	ENSG00000171617	ENC1	chr5:74620431-74641424(-)	ectodermal-neural cortex 1 (with BTB domain)	SMD	2.08	2.25414e-06	downregulated
39	TCONS_00252654	ENSG00000227486	RP13-188A5.1	chrX:55908122-56205319(+)		splicing	1.48	9.96493e-05	upregulated
40	TCONS_00059491	ENSG00000170581	STAT2	chr12:56341585-56360169(-)	signal transducer and activator of transcription 2, 113kDa	SMD, editing, miRNA	2.02	5.97107e-10	downregulated
41	TCONS_00220235	ENSG00000136261	BZW2	chr7:16661213-16706523(+)	basic leucine zipper and W2 domains 2	splicing	1.61	9.0336e-21	upregulated
42	ENST00000576153	ENSG00000161921	CXCL16	chr17:4733574-4736380(-)	chemokine (C-X-C motif) ligand 16	editing	1.55	5.03581e-05	downregulated
43	TCONS_00252652	ENSG00000227486	RP13-188A5.1	chrX:55908083-56058276(+)		splicing, editing	1.48	9.96493e-05	upregulated
44	TCONS_00210928	ENSG00000137269	LRRC1	chr6:53794496-53952190(+)	leucine rich repeat containing 1	SMD, splicing, editing	1.54	1.12874e-05	downregulated
45	ENST00000569832	ENSG00000261713	SSTR5-AS1	chr16:1064092-1078673(-)	SSTR5 antisense RNA 1	splicing	2.51	0.00161347	upregulated
46	TCONS_00193640	ENSG00000163106	HPGDS	chr4:94309274-94562940(-)	hematopoietic prostaglandin D synthase	splicing	1.57	0.000125416	downregulated
47	TCONS_00253752	ENSG00000270524	QTRT1P1	chrX:113634059-113961241(+)	queuine tRNA-ribosyltransferase 1 pseudogene 1	SMD	3.54	4.124e-12	upregulated
48	TCONS_00201311	ENSG00000145934	TENM2	chr5:167748353-168267578(+)	teneurin transmembrane protein 2	editing	4.1	2.50003e-12	downregulated
49	ENST00000382142	ENSG00000150712	MTMR12	chr5:32227005-32313009(-)	myotubularin related protein 12	SMD, editing	1.37	1.22773e-07	upregulated
50	TCONS_00253055	ENSG00000094841	UPRT	chrX:75273902-75373825(+)	uracil phosphoribosyltransferase (FUR1) homolog (S. cerevisiae)	SMD, editing	1.44	0.000186231	upregulated
51	TCONS_00150599	ENSG00000115641	FHL2	chr2:105351918-105399224(-)	four and a half LIM domains 2	SMD, editing	3.7	1.33572e-09	downregulated
52	TCONS_00226572	ENSG00000136267	DGKB	chr7:14143377-14903437(-)	diacylglycerol kinase, beta 90kDa	SMD	3.26	1.59062e-05	upregulated
53	ENST00000292069	ENSG00000198046	ZNF667	chr19:56439324-56477374(-)	zinc finger protein 667	SMD	1.56	0.00106406	upregulated
54	ENST00000556448	ENSG00000259017	RP11-561B11.6	chr14:35447002-35447625(-)		splicing	1.77	0.000853826	upregulated
55	ENST00000397906	ENSG00000100154	TTC28	chr22:27978013-28679865(-)	tetratricopeptide repeat domain 28	SMD	1.57	3.802e-05	downregulated
56	ENST00000380641	ENSG00000044459	CNTLN	chr9:17135039-17302051(+)	centlein, centrosomal protein	SMD, editing	1.55	1.48893e-11	downregulated
57	ENST00000209718	ENSG00000108244	KRT23	chr17:40922695-40937420(-)	keratin 23 (histone deacetylase inducible)	splicing	4.01	1.8123e-06	downregulated
58	ENST00000581273	ENSG00000175106	TVP23C	chr17:15506871-15545916(-)	trans-golgi network vesicle protein 23 homolog C (S. cerevisiae)	splicing	1.42	0.000127496	upregulated
59	TCONS_00232467	ENSG00000104723	TUSC3	chr8:15540222-15790116(+)	tumor suppressor candidate 3	SMD	1.83	6.85022e-06	downregulated
60	TCONS_00153158	ENSG00000081320	STK17B	chr2:196130942-196171687(-)	serine/threonine kinase 17b	SMD, miRNA	1.85	5.60299e-08	downregulated
61	TCONS_00186316	ENSG00000170871	KIAA0232	chr4:6783728-6891278(+)	KIAA0232	editing	1.48	1.97215e-05	upregulated
62	TCONS_00220258	ENSG00000106546	AHR	chr7:17298621-17362497(+)	aryl hydrocarbon receptor	SMD, editing	2.03	1.23001e-11	downregulated
63	TCONS_00256068	ENSG00000158352	SHROOM4	chrX:50585668-50814302(-)	shroom family member 4	SMD, editing	4.23	3.5196e-11	downregulated
64	TCONS_00189925	ENSG00000170390	DCLK2	chr4:150078273-150250895(+)	doublecortin-like kinase 2	SMD, editing	2.61	0.000887764	upregulated
65	TCONS_00182448	ENSG00000065534	MYLK	chr3:123607955-123884331(-)	myosin light chain kinase	splicing	1.73	1.57378e-07	downregulated
66	TCONS_00016418	ENSG00000184005	ST6GALNAC3	chr1:76074702-76304021(-)	ST6 (alpha-N-acetyl-neuraminyl-2,3-beta-galactosyl-1,3)-N-acetylgalactosaminide alpha-2,6-sialyltransferase 3	SMD, miRNA	2.19	7.44694e-06	upregulated
67	ENST00000572705	ENSG00000262304	TRPV1	chr17:3565443-3609411(-)	transient receptor potential cation channel, subfamily V, member 1	SMD, editing, miRNA	1.53	9.31218e-09	upregulated
68	TCONS_00187165	ENSG00000078177	N4BP2	chr4:40095527-40176215(+)	NEDD4 binding protein 2	editing, SMD	1.5	6.3055e-09	downregulated
69	ENST00000491277	ENSG00000152104	PTPN14	chr1:214528275-214551602(-)	protein tyrosine phosphatase, non-receptor type 14	editing	1.53	6.68488e-11	downregulated
70	ENST00000563329	ENSG00000187105	HEATR4	chr14:73523044-73558945(-)	HEAT repeat containing 4	splicing	1.86	1.79604e-08	upregulated
71	ENST00000511480	ENSG00000078177	N4BP2	chr4:40056912-40158251(+)	NEDD4 binding protein 2	SMD, editing	1.5	6.3055e-09	downregulated
72	TCONS_00178350	ENSG00000131370	SH3BP5	chr3:15254852-15333189(-)	SH3-domain binding protein 5 (BTK-associated)	splicing	4.12	2.1211e-18	downregulated
73	TCONS_00210636	ENSG00000170734	POLH	chr6:43576148-43586201(+)	polymerase (DNA directed), eta	editing	1.43	6.10606e-07	downregulated
74	TCONS_00161618	ENSG00000159128	IFNGR2	chr21:33402895-33439319(+)	interferon gamma receptor 2 (interferon gamma transducer 1)	SMD, splicing, editing	1.57	0.00166993	downregulated
75	ENST00000448214	ENSG00000232342	RP11-46O21.2	chr10:74506131-74529355(-)		splicing	1.41	4.50146e-05	upregulated
76	TCONS_00173724	ENSG00000184220	CMSS1	chr3:99817760-100115544(+)	cms1 ribosomal small subunit homolog (yeast)	SMD, editing	2.64	9.2612e-08	upregulated
77	TCONS_00205414	ENSG00000072682	P4HA2	chr5:132183342-132228258(-)	prolyl 4-hydroxylase, alpha polypeptide II	editing, SMD	3.24	1.63452e-12	downregulated
78	TCONS_00030591	ENSG00000107864	CPEB3	chr10:92120582-92291087(-)	cytoplasmic polyadenylation element binding protein 3	SMD, editing	1.7	0.000161606	upregulated
79	TCONS_00117136	ENSG00000134030	CTIF	chr18:48539045-48823024(+)	CBP80/20-dependent translation initiation factor	SMD, editing	2.08	1.10244e-10	downregulated
80	TCONS_00030592	ENSG00000107864	CPEB3	chr10:92160199-92240737(-)	cytoplasmic polyadenylation element binding protein 3	editing	1.7	0.000161606	upregulated
81	TCONS_00098643	ENSG00000103089	FA2H	chr16:74712887-74734620(-)	fatty acid 2-hydroxylase	SMD, editing	2.43	0.000226603	upregulated
82	TCONS_00187460	ENSG00000163071	SPATA18	chr4:52051330-52070294(+)	spermatogenesis associated 18	editing	1.87	7.3164e-22	downregulated
83	ENST00000507810	ENSG00000129595	EPB41L4A	chr5:112142440-112228778(-)	erythrocyte membrane protein band 4.1 like 4A	splicing	1.4	0.000151821	upregulated
84	ENST00000327381	ENSG00000206579	XKR4	chr8:55102388-55542054(+)	XK, Kell blood group complex subunit-related family, member 4	SMD	4.15	2.26477e-09	downregulated
85	TCONS_00098647	ENSG00000103089	FA2H	chr16:74712887-74774831(-)	fatty acid 2-hydroxylase	SMD, editing	2.43	0.000226603	upregulated
86	TCONS_00173729	ENSG00000184220	CMSS1	chr3:99948601-100181962(+)	cms1 ribosomal small subunit homolog (yeast)	editing	2.64	9.2612e-08	upregulated
87	TCONS_00098645	ENSG00000103089	FA2H	chr16:74712887-74774831(-)	fatty acid 2-hydroxylase	SMD, editing	2.43	0.000226603	upregulated
88	TCONS_00098644	ENSG00000103089	FA2H	chr16:74712887-74774831(-)	fatty acid 2-hydroxylase	SMD, editing	2.43	0.000226603	upregulated
89	TCONS_00025760	ENSG00000108175	ZMIZ1	chr10:79070245-79242840(+)	zinc finger, MIZ-type containing 1	SMD, editing	2.38	2.59596e-08	upregulated
90	TCONS_00025761	ENSG00000108175	ZMIZ1	chr10:79070245-79279060(+)	zinc finger, MIZ-type containing 1	SMD, editing	2.38	2.59596e-08	upregulated
91	TCONS_00165085	ENSG00000258555	SPECC1L-ADORA2A	chr22:24270771-24423028(+)	SPECC1L-ADORA2A readthrough (NMD candidate)	editing	1.64	6.47039e-06	upregulated
92	TCONS_00075835	ENSG00000053254	FOXN3	chr14:89192840-89619149(-)	forkhead box N3	SMD, editing	1.85	6.278e-09	upregulated
93	TCONS_00075834	ENSG00000053254	FOXN3	chr14:89192840-89417112(-)	forkhead box N3	SMD, editing	1.85	6.278e-09	upregulated
94	TCONS_00165089	ENSG00000258555	SPECC1L-ADORA2A	chr22:24270816-24423028(+)	SPECC1L-ADORA2A readthrough (NMD candidate)	editing	1.64	6.47039e-06	upregulated
95	ENST00000446045	ENSG00000158122	AAED1	chr9:96639576-96655303(-)	AhpC/TSA antioxidant enzyme domain containing 1	SMD, editing	2.26	4.37424e-10	downregulated
96	ENST00000553127	ENSG00000123352	SPATS2	chr12:49367464-49527424(+)	spermatogenesis associated, serine-rich 2	SMD, editing	1.75	1.12475e-05	downregulated
97	TCONS_00141707	ENSG00000136002	ARHGEF4	chr2:131035484-131061098(+)	Rho guanine nucleotide exchange factor (GEF) 4	SMD	1.5	5.30226e-08	upregulated
98	ENST00000381431	ENSG00000163069	SGCB	chr4:52020705-52038482(-)	sarcoglycan, beta (43kDa dystrophin-associated glycoprotein)	SMD, editing	1.94	6.00929e-21	downregulated
99	ENST00000394562	ENSG00000172123	SLFN12	chr17:35411059-35433196(-)	schlafen family member 12	splicing	1.76	8.3909e-20	downregulated
100	ENST00000508519	ENSG00000245958	RP11-33B1.1	chr4:119454838-119493437(+)		splicing	1.54	0.000357639	upregulated
101	TCONS_00192320	ENSG00000074966	TXK	chr4:48057877-48120178(-)	TXK tyrosine kinase	editing	2.27	4.04729e-05	upregulated
102	TCONS_00192322	ENSG00000135605	TEC	chr4:48057877-48269864(-)	tec protein tyrosine kinase	editing	1.97	0.000158184	upregulated
103	ENST00000371666	ENSG00000131724	IL13RA1	chrX:118727571-118794539(+)	interleukin 13 receptor, alpha 1	SMD	2.65	4.2748e-11	downregulated
104	TCONS_00027009	ENSG00000150593	PDCD4	chr10:110871767-110919486(+)	programmed cell death 4 (neoplastic transformation inhibitor)	SMD, editing	1.38	3.22784e-06	upregulated
105	ENST00000479069	ENSG00000204217	BMPR2	chr2:202464825-202475139(+)	bone morphogenetic protein receptor, type II (serine/threonine kinase)	splicing	1.58	5.1875e-06	downregulated
106	TCONS_00027001	ENSG00000150593	PDCD4	chr10:110871728-110919486(+)	programmed cell death 4 (neoplastic transformation inhibitor)	SMD, editing	1.38	3.22784e-06	upregulated
107	TCONS_00007944	ENSG00000183853	KIRREL	chr1:157993272-158102664(+)	kin of IRRE like (Drosophila)	SMD	4.12	4.32368e-25	downregulated
108	ENST00000371065	ENSG00000213625	LEPROT	chr1:65420586-65436007(+)	leptin receptor overlapping transcript	SMD	1.51	7.04983e-09	downregulated
109	TCONS_00001594	ENSG00000271840	RP1-224A6.9	chr1:22094347-22143096(+)		SMD, editing	2.17	6.82536e-05	upregulated
110	TCONS_00156217	ENSG00000226465	RP13-401N8.1	chr20:25696911-25755024(+)		splicing	1.57	2.29249e-06	upregulated
111	ENST00000375846	ENSG00000213694	S1PR3	chr9:88996505-89005010(+)	sphingosine-1-phosphate receptor 3	editing	1.73	2.48463e-11	upregulated
112	TCONS_00067018	ENSG00000005810	MYCBP2	chr13:77035409-77327102(-)	MYC binding protein 2, E3 ubiquitin protein ligase	splicing	1.38	1.18709e-05	upregulated
113	TCONS_00195828	ENSG00000109771	LRP2BP	chr4:185363849-185396097(-)	LRP2 binding protein	SMD, editing	1.46	8.1378e-07	upregulated
114	TCONS_00195633	ENSG00000038002	AGA	chr4:177388157-177510422(-)	aspartylglucosaminidase	splicing	1.4	2.25982e-06	upregulated
115	TCONS_00008112	ENSG00000162736	NCSTN	chr1:160325534-160361137(+)	nicastrin	SMD	1.34	1.22932e-06	downregulated
116	ENST00000334197	ENSG00000197937	ZNF347	chr19:53138703-53159031(-)	zinc finger protein 347	SMD, editing	1.5	0.000486859	downregulated
117	TCONS_00189315	ENSG00000245958	RP11-33B1.1	chr4:119438646-119565906(+)		splicing	1.54	0.000357639	upregulated
118	TCONS_00196430	ENSG00000038382	TRIO	chr5:14143701-14511583(+)	trio Rho guanine nucleotide exchange factor	editing	2.44	1.7103e-15	downregulated
119	TCONS_00208479	ENSG00000112186	CAP2	chr6:17393215-17558199(+)	CAP, adenylate cyclase-associated protein, 2 (yeast)	editing	1.9	7.9732e-07	downregulated
120	TCONS_00088780	ENSG00000103528	SYT17	chr16:19168201-19252413(+)	synaptotagmin XVII	editing	1.69	2.70611e-06	upregulated
121	TCONS_00175515	ENSG00000144935	TRPC1	chr3:142724002-142808138(+)	transient receptor potential cation channel, subfamily C, member 1	editing	1.71	1.17831e-05	downregulated
122	TCONS_00021902	ENSG00000152104	PTPN14	chr1:214391492-214551742(-)	protein tyrosine phosphatase, non-receptor type 14	editing, miRNA	1.53	6.68488e-11	downregulated
123	TCONS_00021903	ENSG00000152104	PTPN14	chr1:214391492-214551757(-)	protein tyrosine phosphatase, non-receptor type 14	editing, miRNA	1.53	6.68488e-11	downregulated
124	ENST00000445092	ENSG00000172123	SLFN12	chr17:35422820-35433145(-)	schlafen family member 12	splicing	1.76	8.3909e-20	downregulated
125	TCONS_00182243	ENSG00000113924	HGD	chr3:120627267-120742993(-)	homogentisate 1,2-dioxygenase	SMD	2.81	2.26477e-09	upregulated
126	TCONS_00083747	ENSG00000128833	MYO5C	chr15:52192321-52250376(-)	myosin VC	SMD	1.7	0.00116646	upregulated
127	ENST00000468216	ENSG00000161040	FBXL13	chr7:102926282-102933735(-)	F-box and leucine-rich repeat protein 13	splicing	1.59	1.81495e-05	downregulated
128	ENST00000524750	ENSG00000085117	CD82	chr11:44618269-44619709(+)	CD82 molecule	SMD, editing	1.52	0.000108682	upregulated
129	ENST00000295822	ENSG00000163577	EIF5A2	chr3:170888414-170908693(-)	eukaryotic translation initiation factor 5A2	SMD, editing	1.88	0.000446975	downregulated
130	ENST00000472297	ENSG00000233836	RP11-255H23.2	chr19:23790771-23833314(+)		splicing	3.44	7.87526e-12	upregulated
131	ENST00000280800	ENSG00000151176	PLBD2	chr12:113358569-113391625(+)	phospholipase B domain containing 2	SMD, editing	2.3	7.73518e-08	downregulated
132	TCONS_00166381	ENSG00000100351	GRAP2	chr22:39926590-39981264(+)	GRB2-related adaptor protein 2	SMD, editing	2.17	1.49485e-06	upregulated
133	TCONS_00111258	ENSG00000108244	KRT23	chr17:40922058-40937634(-)	keratin 23 (histone deacetylase inducible)	splicing	4.01	1.8123e-06	downregulated
134	TCONS_00030132	ENSG00000148660	CAMK2G	chr10:73811960-73874591(-)	calcium/calmodulin-dependent protein kinase II gamma	SMD, editing	1.41	0.000119913	upregulated
135	TCONS_00030130	ENSG00000148660	CAMK2G	chr10:73811960-73874591(-)	calcium/calmodulin-dependent protein kinase II gamma	SMD, editing	1.41	0.000119913	upregulated
136	TCONS_00141673	ENSG00000136002	ARHGEF4	chr2:130837311-130963615(+)	Rho guanine nucleotide exchange factor (GEF) 4	SMD, editing	1.5	5.30226e-08	upregulated
137	ENST00000345097	ENSG00000053254	FOXN3	chr14:89156171-89619130(-)	forkhead box N3	miRNA	1.85	6.278e-09	upregulated
138	TCONS_00141670	ENSG00000136002	ARHGEF4	chr2:130837301-130963615(+)	Rho guanine nucleotide exchange factor (GEF) 4	SMD, editing	1.5	5.30226e-08	upregulated
139	TCONS_00152105	ENSG00000082438	COBLL1	chr2:164636985-164819300(-)	cordon-bleu WH2 repeat protein-like 1	editing, SMD	1.39	5.96905e-06	upregulated
140	TCONS_00147106	ENSG00000119778	ATAD2B	chr2:23714475-23940269(-)	ATPase family, AAA domain containing 2B	SMD, editing	1.47	3.67862e-05	upregulated
141	TCONS_00152107	ENSG00000082438	COBLL1	chr2:164636985-164842174(-)	cordon-bleu WH2 repeat protein-like 1	editing, SMD	1.39	5.96905e-06	upregulated
142	TCONS_00103262	ENSG00000108352	RAPGEFL1	chr17:40177494-40195699(+)	Rap guanine nucleotide exchange factor (GEF)-like 1	editing	1.6	0.000142781	upregulated
143	TCONS_00141679	ENSG00000136002	ARHGEF4	chr2:130837322-130963615(+)	Rho guanine nucleotide exchange factor (GEF) 4	SMD, editing	1.5	5.30226e-08	upregulated
144	TCONS_00103261	ENSG00000108352	RAPGEFL1	chr17:40177494-40195699(+)	Rap guanine nucleotide exchange factor (GEF)-like 1	editing	1.6	0.000142781	upregulated
145	ENST00000535889	ENSG00000116984	MTR	chr1:236795280-236903981(+)	5-methyltetrahydrofolate-homocysteine methyltransferase	editing	1.46	2.65307e-05	upregulated
146	ENST00000580666	ENSG00000108932	SLC16A6	chr17:68268196-68291266(-)	solute carrier family 16, member 6	splicing	1.85	3.02506e-08	upregulated
147	TCONS_00244728	ENSG00000157693	C9orf91	chr9:114619983-114647506(+)	chromosome 9 open reading frame 91	SMD, editing	1.57	1.2528e-05	downregulated
148	TCONS_00216783	ENSG00000135314	KHDC1	chr6:73274138-73310365(-)	KH homology domain containing 1	editing	2.28	1.12476e-10	downregulated
149	ENST00000353231	ENSG00000172243	CLEC7A	chr12:10116776-10130241(-)	C-type lectin domain family 7, member A	SMD	1.6	0.000174064	upregulated
150	TCONS_00157701	ENSG00000124164	VAPB	chr20:58414406-58467061(+)	VAMP (vesicle-associated membrane protein)-associated protein B and C	editing, SMD	1.42	3.36446e-06	upregulated
151	TCONS_00065103	ENSG00000134882	UBAC2	chr13:99224865-99365484(+)	UBA domain containing 2	editing	1.44	2.95658e-09	upregulated
152	TCONS_00243068	ENSG00000277697	RP11-459O16.9	chr9:42946095-43007947(+)		SMD	3.29	1.34312e-21	upregulated
153	TCONS_00076763	ENSG00000088808	PPP1R13B	chr14:103755905-103848821(-)	protein phosphatase 1, regulatory subunit 13B	SMD, editing	1.65	5.29118e-06	upregulated
154	TCONS_00251307	ENSG00000101846	STS	chrX:7138476-7355251(+)	steroid sulfatase (microsomal), isozyme S	SMD	1.64	0.000665132	downregulated
155	ENST00000522586	ENSG00000071051	NCK2	chr2:105816557-105893176(+)	NCK adaptor protein 2	splicing	1.4	4.51385e-05	upregulated
156	TCONS_00008758	ENSG00000076258	FMO4	chr1:171313312-171349012(+)	flavin containing monooxygenase 4	editing, SMD	1.58	5.62999e-06	downregulated
157	ENST00000359543	ENSG00000213853	EMP2	chr16:10528421-10580698(-)	epithelial membrane protein 2	SMD, editing	1.57	3.31492e-07	upregulated
158	ENST00000280154	ENSG00000150593	PDCD4	chr10:110871806-110900006(+)	programmed cell death 4 (neoplastic transformation inhibitor)	SMD	1.38	3.22784e-06	upregulated
159	TCONS_00116668	ENSG00000134757	DSG3	chr18:31447509-31552148(+)	desmoglein 3	splicing, miRNA	3.72	2.28772e-06	downregulated
160	ENST00000262031	ENSG00000076067	RBMS2	chr12:56521928-56596196(+)	RNA binding motif, single stranded interacting protein 2	SMD, editing	2.47	2.92548e-07	downregulated
161	TCONS_00243136	ENSG00000170161	GLIDR	chr9:62895770-62913039(+)	glioblastoma down-regulated RNA	SMD	1.75	0.000361601	upregulated
162	ENST00000569540	ENSG00000166822	TMEM170A	chr16:75445713-75464416(-)	transmembrane protein 170A	SMD, editing	1.48	1.38731e-09	upregulated
163	TCONS_00251309	ENSG00000101846	STS	chrX:7147921-7355251(+)	steroid sulfatase (microsomal), isozyme S	SMD	1.64	0.000665132	downregulated
164	ENST00000512143	ENSG00000134853	PDGFRA	chr4:54229292-54261412(+)	platelet-derived growth factor receptor, alpha polypeptide	splicing	7.3	4.82605e-41	downregulated
165	ENST00000389534	ENSG00000197608	ZNF841	chr19:52064465-52084888(-)	zinc finger protein 841	SMD, editing	1.54	2.58945e-14	downregulated
166	ENST00000336505	ENSG00000173611	SCAI	chr9:124942607-125143496(-)	suppressor of cancer cell invasion	editing	1.54	0.000304323	upregulated
167	TCONS_00244055	ENSG00000165238	WNK2	chr9:93184915-93346597(+)	WNK lysine deficient protein kinase 2	editing	2.2	5.51343e-12	upregulated
168	ENST00000494977	ENSG00000139132	FGD4	chr12:32582378-32644751(+)	FYVE, RhoGEF and PH domain containing 4	splicing	1.44	1.11996e-08	upregulated
169	ENST00000535902	ENSG00000111261	MANSC1	chr12:12326055-12350541(-)	MANSC domain containing 1	editing	1.54	3.26901e-05	upregulated
170	ENST00000302000	ENSG00000171016	PYGO1	chr15:55538889-55588947(-)	pygopus family PHD finger 1	SMD, editing	3.78	9.77026e-14	downregulated
171	ENST00000366956	ENSG00000152104	PTPN14	chr1:214348695-214551223(-)	protein tyrosine phosphatase, non-receptor type 14	SMD, editing	1.53	6.68488e-11	downregulated
172	TCONS_00173730	ENSG00000184220	CMSS1	chr3:100051993-100178121(+)	cms1 ribosomal small subunit homolog (yeast)	editing	2.64	9.2612e-08	upregulated
173	TCONS_00138597	ENSG00000115306	SPTBN1	chr2:54456284-54671566(+)	spectrin, beta, non-erythrocytic 1	miRNA	1.68	2.26613e-05	downregulated
174	ENST00000268097	ENSG00000213614	HEXA	chr15:72340918-72376476(-)	hexosaminidase A (alpha polypeptide)	SMD, editing	1.48	1.59276e-10	downregulated
175	ENST00000505881	ENSG00000196353	CPNE4	chr3:131696541-131925581(-)	copine IV	splicing	3.94	5.08294e-07	downregulated
176	TCONS_00188222	ENSG00000138764	CCNG2	chr4:77297148-77515679(+)	cyclin G2	splicing	1.91	3.02544e-05	downregulated
177	ENST00000527227	ENSG00000172890	NADSYN1	chr11:71480151-71481430(+)	NAD synthetase 1	splicing	1.52	2.38687e-07	upregulated
178	TCONS_00240046	ENSG00000120963	ZNF706	chr8:101164918-101210787(-)	zinc finger protein 706	SMD, editing	1.5	9.61843e-05	upregulated
179	TCONS_00165721	ENSG00000182541	LIMK2	chr22:31248329-31276497(+)	LIM domain kinase 2	SMD	1.48	9.57559e-08	downregulated
180	TCONS_00240045	ENSG00000120963	ZNF706	chr8:101164918-101205329(-)	zinc finger protein 706	SMD, editing	1.5	9.61843e-05	upregulated
181	TCONS_00005261	ENSG00000143036	SLC44A3	chr1:94820341-94901789(+)	solute carrier family 44, member 3	SMD	1.95	1.98766e-06	downregulated
182	TCONS_00104871	ENSG00000108924	HLF	chr17:55265011-55607150(+)	hepatic leukemia factor	SMD, editing	2.92	3.79974e-06	upregulated
183	TCONS_00191933	ENSG00000238694	snoU13	chr4:34960695-35081006(-)	Small nucleolar RNA U13	splicing	3.06	7.86736e-05	upregulated
184	TCONS_00229066	ENSG00000170381	SEMA3E	chr7:83362130-83649198(-)	sema domain, immunoglobulin domain (Ig), short basic domain, secreted, (semaphorin) 3E	SMD	2.67	0.000957108	upregulated
185	ENST00000276431	ENSG00000120889	TNFRSF10B	chr8:23020132-23069179(-)	tumor necrosis factor receptor superfamily, member 10b	miRNA	1.57	2.52999e-06	downregulated
186	TCONS_00160920	ENSG00000101213	PTK6	chr20:63521262-63535745(-)	protein tyrosine kinase 6	editing, SMD	1.53	0.000102848	upregulated
187	TCONS_00149280	ENSG00000264324	RP11-287D1.3	chr2:74214063-74392087(-)	Uncharacterized protein {ECO:0000313|Ensembl:ENSP00000416453}	SMD, editing	1.57	3.80136e-14	upregulated
188	TCONS_00246881	ENSG00000147889	CDKN2A	chr9:21965816-21980957(-)	cyclin-dependent kinase inhibitor 2A	editing	3.5	4.92988e-11	downregulated
189	ENST00000451463	ENSG00000071051	NCK2	chr2:105745062-105894274(+)	NCK adaptor protein 2	splicing	1.4	4.51385e-05	upregulated
190	TCONS_00218556	ENSG00000016402	IL20RA	chr6:136982164-137044312(-)	interleukin 20 receptor, alpha	splicing	1.79	7.5413e-08	upregulated
191	TCONS_00161482	ENSG00000156273	BACH1	chr21:29298850-29384314(+)	BTB and CNC homology 1, basic leucine zipper transcription factor 1	editing, SMD	1.74	0.000562251	downregulated
192	TCONS_00142168	ENSG00000150556	LYPD6B	chr2:149038466-149220705(+)	LY6/PLAUR domain containing 6B	SMD, editing	1.76	0.00232761	upregulated
193	TCONS_00135631	ENSG00000197608	ZNF841	chr19:52010245-52095778(-)	zinc finger protein 841	SMD, editing, miRNA	1.54	2.58945e-14	downregulated
194	TCONS_00200709	ENSG00000169252	ADRB2	chr5:148825244-148979499(+)	adrenoceptor beta 2, surface	SMD	2	1.84841e-12	upregulated
195	ENST00000258761	ENSG00000136261	BZW2	chr7:16646130-16706523(+)	basic leucine zipper and W2 domains 2	splicing	1.61	9.0336e-21	upregulated
196	TCONS_00199319	ENSG00000064652	SNX24	chr5:122845448-122889589(+)	sorting nexin 24	splicing, editing	1.8	1.82567e-14	downregulated
197	TCONS_00247297	ENSG00000215187	FAM166B	chr9:35561830-35596730(-)	family with sequence similarity 166, member B	editing	1.51	1.27591e-07	upregulated
198	ENST00000547804	ENSG00000235884	LINC00941	chr12:30795930-30802711(+)	long intergenic non-protein coding RNA 941	editing	1.64	0.000637744	upregulated
199	ENST00000367619	ENSG00000057252	SOAT1	chr1:179293801-179358680(+)	sterol O-acyltransferase 1	editing	1.81	9.76563e-07	downregulated
200	TCONS_00057960	ENSG00000111371	SLC38A1	chr12:46177579-46276123(-)	solute carrier family 38, member 1	editing	1.49	0.000125333	upregulated
201	ENST00000209929	ENSG00000094963	FMO2	chr1:171185207-171211230(+)	flavin containing monooxygenase 2 (non-functional)	splicing	2.74	2.60693e-18	downregulated
202	TCONS_00119961	ENSG00000176641	RNF152	chr18:61783101-61894294(-)	ring finger protein 152	SMD, editing	1.89	2.01319e-07	downregulated
203	TCONS_00242866	ENSG00000137106	GRHPR	chr9:37422665-37465367(+)	glyoxylate reductase/hydroxypyruvate reductase	SMD, editing	1.41	2.33422e-12	upregulated
204	ENST00000409359	ENSG00000136002	ARHGEF4	chr2:130837454-130947230(+)	Rho guanine nucleotide exchange factor (GEF) 4	SMD	1.5	5.30226e-08	upregulated
205	ENST00000375403	ENSG00000150401	DCUN1D2	chr13:113455818-113490691(-)	DCN1, defective in cullin neddylation 1, domain containing 2	SMD	1.47	3.99101e-09	upregulated
206	TCONS_00192137	ENSG00000163697	APBB2	chr4:40806587-41214618(-)	amyloid beta (A4) precursor protein-binding, family B, member 2	splicing, SMD	2.43	2.49422e-09	downregulated
207	ENST00000316077	ENSG00000129680	MAP7D3	chrX:136216810-136251579(-)	MAP7 domain containing 3	SMD, editing	1.85	1.58333e-10	downregulated
208	TCONS_00142157	ENSG00000150556	LYPD6B	chr2:149038466-149220705(+)	LY6/PLAUR domain containing 6B	editing	1.76	0.00232761	upregulated
209	ENST00000463899	ENSG00000135838	NPL	chr1:182789736-182827020(+)	N-acetylneuraminate pyruvate lyase (dihydrodipicolinate synthase)	splicing	1.94	3.0479e-18	downregulated
210	ENST00000280571	ENSG00000150977	RILPL2	chr12:123410682-123436717(-)	Rab interacting lysosomal protein-like 2	editing	1.64	3.63634e-08	downregulated
211	TCONS_00050192	ENSG00000139132	FGD4	chr12:32399440-32649676(+)	FYVE, RhoGEF and PH domain containing 4	editing	1.44	1.11996e-08	upregulated
212	TCONS_00235699	ENSG00000164830	OXR1	chr8:106616248-106762632(+)	oxidation resistance 1	SMD	1.61	6.8e-05	upregulated
213	TCONS_00235698	ENSG00000164830	OXR1	chr8:106616194-106762632(+)	oxidation resistance 1	SMD	1.61	6.8e-05	upregulated
214	TCONS_00157234	ENSG00000277022	RP3-453C12.15	chr20:45427360-45439386(+)		editing	2.08	5.56748e-07	upregulated
215	TCONS_00050195	ENSG00000139132	FGD4	chr12:32480797-32649676(+)	FYVE, RhoGEF and PH domain containing 4	editing	1.44	1.11996e-08	upregulated
216	ENST00000405202	ENSG00000136261	BZW2	chr7:16646194-16706481(+)	basic leucine zipper and W2 domains 2	splicing	1.61	9.0336e-21	upregulated
217	TCONS_00123889	ENSG00000205246	RPSAP58	chr19:23762484-23872835(+)	ribosomal protein SA pseudogene 58	SMD, splicing, editing, miRNA	2.15	4.60978e-17	upregulated
218	TCONS_00247562	ENSG00000106714	CNTNAP3	chr9:39062118-39288315(-)	contactin associated protein-like 3	editing	1.72	1.04635e-07	upregulated
219	TCONS_00234826	ENSG00000104427	ZC2HC1A	chr8:78666043-78710503(+)	zinc finger, C2HC-type containing 1A	editing	2.28	5.60556e-16	downregulated
220	TCONS_00233179	ENSG00000104765	BNIP3L	chr8:26383724-26437502(+)	BCL2/adenovirus E1B 19kDa interacting protein 3-like	editing	1.4	1.54182e-05	upregulated
221	TCONS_00089062	ENSG00000103319	EEF2K	chr16:22206274-22289192(+)	eukaryotic elongation factor-2 kinase	SMD, editing, miRNA	1.51	7.37041e-06	upregulated
222	TCONS_00150627	ENSG00000115652	UXS1	chr2:106079874-106194339(-)	UDP-glucuronate decarboxylase 1	editing	2.16	1.35355e-12	upregulated
223	TCONS_00168220	ENSG00000100296	THOC5	chr22:29498810-29582235(-)	THO complex 5	SMD, editing, miRNA	1.49	2.21623e-07	upregulated
224	ENST00000548404	ENSG00000257489	RP11-175P13.3	chr12:100173195-100196976(-)		splicing	1.83	0.000541598	upregulated
225	TCONS_00243477	ENSG00000134996	OSTF1	chr9:75088483-75144649(+)	osteoclast stimulating factor 1	editing	1.45	0.000129265	upregulated
226	TCONS_00004721	ENSG00000184005	ST6GALNAC3	chr1:76113376-76654449(+)	ST6 (alpha-N-acetyl-neuraminyl-2,3-beta-galactosyl-1,3)-N-acetylgalactosaminide alpha-2,6-sialyltransferase 3	editing	2.19	7.44694e-06	upregulated
227	TCONS_00060110	ENSG00000174206	C12orf66	chr12:64172499-64222296(-)	chromosome 12 open reading frame 66	SMD, editing	1.44	2.36558e-07	upregulated
228	TCONS_00148720	ENSG00000143951	WDPCP	chr2:63548209-63746506(-)	WD repeat containing planar cell polarity effector	splicing, editing	1.49	2.61501e-06	upregulated
229	TCONS_00251977	ENSG00000171657	GPR82	chrX:41713910-41730135(+)	G protein-coupled receptor 82	splicing	2	1.28591e-23	downregulated
230	ENST00000228741	ENSG00000111145	ELK3	chr12:96194381-96269835(+)	ELK3, ETS-domain protein (SRF accessory protein 2)	splicing	1.61	2.9765e-05	downregulated
231	TCONS_00238831	ENSG00000172817	CYP7B1	chr8:64587762-64800554(-)	cytochrome P450, family 7, subfamily B, polypeptide 1	SMD	2.4	3.39671e-22	downregulated
232	TCONS_00247616	ENSG00000204837	RP11-204M4.2	chr9:39794412-39819730(-)		SMD	1.65	0.000173993	upregulated
233	TCONS_00163375	ENSG00000159216	RUNX1	chr21:35001387-35049344(-)	runt-related transcription factor 1	editing	3.61	5.75118e-09	downregulated
234	TCONS_00189916	ENSG00000170390	DCLK2	chr4:150078273-150250895(+)	doublecortin-like kinase 2	SMD, editing	2.61	0.000887764	upregulated
235	TCONS_00189917	ENSG00000170390	DCLK2	chr4:150078273-150250895(+)	doublecortin-like kinase 2	SMD, editing	2.61	0.000887764	upregulated
236	TCONS_00198039	ENSG00000049860	HEXB	chr5:74685143-74748889(+)	hexosaminidase B (beta polypeptide)	SMD	1.39	3.62187e-06	downregulated
237	TCONS_00204911	ENSG00000129595	EPB41L4A	chr5:112179150-112421254(-)	erythrocyte membrane protein band 4.1 like 4A	splicing, editing	1.4	0.000151821	upregulated
238	TCONS_00124891	ENSG00000171817	ZNF540	chr19:37594829-37640408(+)	zinc finger protein 540	SMD, editing	1.6	6.56258e-06	upregulated
239	TCONS_00022946	ENSG00000143702	CEP170	chr1:243135751-243225893(-)	centrosomal protein 170kDa	splicing	1.89	7.07426e-14	downregulated
240	TCONS_00219475	ENSG00000184465	WDR27	chr6:169561739-169723615(-)	WD repeat domain 27	splicing, editing	1.47	1.83671e-07	upregulated
241	ENST00000378204	ENSG00000182197	EXT1	chr8:117794489-118111853(-)	exostosin glycosyltransferase 1	SMD, editing	1.46	7.97283e-05	downregulated
242	TCONS_00232076	ENSG00000104728	ARHGEF10	chr8:1842189-1958659(+)	Rho guanine nucleotide exchange factor (GEF) 10	editing	1.58	1.51613e-07	downregulated
243	TCONS_00219473	ENSG00000184465	WDR27	chr6:169548067-169723620(-)	WD repeat domain 27	SMD, editing	1.47	1.83671e-07	upregulated
244	TCONS_00235393	ENSG00000104356	POP1	chr8:98063715-98170084(+)	processing of precursor 1, ribonuclease P/MRP subunit (S. cerevisiae)	editing	1.41	0.000264484	upregulated
245	TCONS_00225244	ENSG00000170379	FAM115C	chr7:143620912-143650799(+)	family with sequence similarity 115, member C	editing	1.61	5.11374e-05	upregulated
246	ENST00000409858	ENSG00000197355	UAP1L1	chr9:137077500-137084538(+)	UDP-N-acetylglucosamine pyrophosphorylase 1 like 1	miRNA	4.47	8.00453e-14	downregulated
247	ENST00000432564	ENSG00000196917	HCAR1	chr12:122726075-122730843(-)	hydroxycarboxylic acid receptor 1	SMD, editing	1.92	3.70308e-05	upregulated
248	ENST00000593250	ENSG00000101624	CEP76	chr18:12684295-12702667(-)	centrosomal protein 76kDa	splicing, editing	1.71	0.0002146	upregulated
249	TCONS_00202516	ENSG00000150756	FAM173B	chr5:10185729-10250004(-)	family with sequence similarity 173, member B	editing	1.52	4.86394e-05	upregulated
250	ENST00000406451	ENSG00000048052	HDAC9	chr7:18495745-19002416(+)	histone deacetylase 9	SMD	3.37	1.11724e-14	downregulated
251	TCONS_00196475	ENSG00000183580	FBXL7	chr5:15501437-15738276(+)	F-box and leucine-rich repeat protein 7	SMD, editing	2.02	1.04635e-07	downregulated
252	ENST00000556539	ENSG00000170581	STAT2	chr12:56341596-56349775(-)	signal transducer and activator of transcription 2, 113kDa	editing	2.02	5.97107e-10	downregulated
253	ENST00000512404	ENSG00000137106	GRHPR	chr9:37432086-37433881(+)	glyoxylate reductase/hydroxypyruvate reductase	splicing	1.41	2.33422e-12	upregulated
254	ENST00000323816	ENSG00000007237	GAS7	chr17:9910608-10114553(-)	growth arrest-specific 7	SMD, editing	6.47	1.0665e-14	downregulated
255	TCONS_00190999	ENSG00000182903	ZNF721	chr4:410278-474167(-)	zinc finger protein 721	editing, miRNA	1.46	0.000541641	upregulated
256	TCONS_00075840	ENSG00000053254	FOXN3	chr14:89325388-89619149(-)	forkhead box N3	editing, SMD, miRNA	1.85	6.278e-09	upregulated
257	TCONS_00075841	ENSG00000053254	FOXN3	chr14:89325388-89619149(-)	forkhead box N3	editing, SMD, miRNA	1.85	6.278e-09	upregulated
258	TCONS_00234854	ENSG00000205189	ZBTB10	chr8:80483799-80543746(+)	zinc finger and BTB domain containing 10	editing	2.05	7.94476e-05	upregulated
259	ENST00000399120	ENSG00000159267	HLCS	chr21:36751191-36966473(-)	holocarboxylase synthetase (biotin-(proprionyl-CoA-carboxylase (ATP-hydrolysing)) ligase)	splicing, editing	1.43	9.31908e-05	upregulated
260	TCONS_00075844	ENSG00000053254	FOXN3	chr14:89404510-89417112(-)	forkhead box N3	SMD, editing, miRNA	1.85	6.278e-09	upregulated
261	TCONS_00075845	ENSG00000053254	FOXN3	chr14:89404510-89619149(-)	forkhead box N3	SMD, editing, miRNA	1.85	6.278e-09	upregulated
262	ENST00000381639	ENSG00000205763	RP9P	chr7:32916814-32943176(-)	retinitis pigmentosa 9 pseudogene	splicing	1.6	6.7362e-06	downregulated
263	ENST00000442007	ENSG00000229852	RP11-398K22.12	chr6:73263214-73276517(+)		editing	2	2.40392e-08	downregulated
264	ENST00000617275	ENSG00000169499	PLEKHA2	chr8:38901290-38973909(+)	pleckstrin homology domain containing, family A (phosphoinositide binding specific) member 2	editing	2.14	2.04012e-12	downregulated
265	TCONS_00226586	ENSG00000136267	DGKB	chr7:14471421-14903381(-)	diacylglycerol kinase, beta 90kDa	SMD	3.26	1.59062e-05	upregulated
266	TCONS_00226588	ENSG00000136267	DGKB	chr7:14471421-14903874(-)	diacylglycerol kinase, beta 90kDa	SMD	3.26	1.59062e-05	upregulated
267	ENST00000358157	ENSG00000213694	S1PR3	chr9:88991446-89005010(+)	sphingosine-1-phosphate receptor 3	editing	1.73	2.48463e-11	upregulated
268	ENST00000548283	ENSG00000198270	TMEM116	chr12:111932584-112013139(-)	transmembrane protein 116	editing	1.51	2.38006e-06	upregulated
269	ENST00000467462	ENSG00000055955	ITIH4	chr3:52821078-52823706(-)	inter-alpha-trypsin inhibitor heavy chain family, member 4	splicing	2.4	3.02858e-06	upregulated
270	ENST00000613994	ENSG00000130338	TULP4	chr6:158310363-158312363(+)	tubby like protein 4	splicing	1.55	1.61644e-06	upregulated
271	ENST00000439138	ENSG00000006042	TMEM98	chr17:32928209-32940978(+)	transmembrane protein 98	splicing	4.96	9.52668e-25	downregulated
272	TCONS_00011236	ENSG00000183780	SLC35F3	chr1:234227421-234384263(+)	solute carrier family 35, member F3	editing	1.82	0.000326385	upregulated
273	TCONS_00027130	ENSG00000148735	PLEKHS1	chr10:113751428-113760729(+)	pleckstrin homology domain containing, family S member 1	editing	3.98	1.44118e-16	downregulated
274	ENST00000588835	ENSG00000267476	RP11-126O1.4	chr18:58672612-58752730(-)		splicing	1.67	0.00249736	downregulated
275	TCONS_00194655	ENSG00000109381	ELF2	chr4:139017482-139115374(-)	E74-like factor 2 (ets domain transcription factor)	editing	1.68	2.36084e-05	upregulated
276	TCONS_00227594	ENSG00000106571	GLI3	chr7:42132188-42237873(-)	GLI family zinc finger 3	SMD	1.62	1.32485e-07	downregulated
277	TCONS_00194652	ENSG00000109381	ELF2	chr4:139017482-139115374(-)	E74-like factor 2 (ets domain transcription factor)	editing	1.68	2.36084e-05	upregulated
278	ENST00000590442	ENSG00000074657	ZNF532	chr18:58979566-58985944(+)	zinc finger protein 532	editing	4.39	4.87808e-32	downregulated
279	TCONS_00174508	ENSG00000036828	CASR	chr3:122184332-122293081(+)	calcium-sensing receptor	SMD, editing	2.99	4.13959e-05	upregulated
280	ENST00000429715	ENSG00000005810	MYCBP2	chr13:77044901-77087514(-)	MYC binding protein 2, E3 ubiquitin protein ligase	splicing	1.38	1.18709e-05	upregulated
281	ENST00000330676	ENSG00000185561	TLCD2	chr17:1702789-1710438(-)	TLC domain containing 2	editing	1.8	4.54493e-06	downregulated
282	ENST00000403729	ENSG00000163297	ANTXR2	chr4:79901148-80073086(-)	anthrax toxin receptor 2	SMD, editing	2.7	6.75833e-07	downregulated
283	ENST00000283928	ENSG00000153814	JAZF1	chr7:27830572-28180743(-)	JAZF zinc finger 1	splicing	1.78	0.00253423	downregulated
284	TCONS_00051899	ENSG00000076067	RBMS2	chr12:56561997-56596196(+)	RNA binding motif, single stranded interacting protein 2	SMD, editing	2.47	2.92548e-07	downregulated
285	ENST00000338977	ENSG00000182903	ZNF721	chr4:439987-499102(-)	zinc finger protein 721	SMD, splicing, editing, miRNA	1.46	0.000541641	upregulated
286	TCONS_00213181	ENSG00000130338	TULP4	chr6:158232191-158513321(+)	tubby like protein 4	SMD	1.55	1.61644e-06	upregulated
287	TCONS_00051891	ENSG00000076067	RBMS2	chr12:56521847-56573147(+)	RNA binding motif, single stranded interacting protein 2	SMD	2.47	2.92548e-07	downregulated
288	TCONS_00218558	ENSG00000016402	IL20RA	chr6:136982164-137044312(-)	interleukin 20 receptor, alpha	splicing	1.79	7.5413e-08	upregulated
289	ENST00000336787	ENSG00000069974	RAB27A	chr15:55202968-55289815(-)	RAB27A, member RAS oncogene family	SMD, editing	2.48	8.48011e-08	downregulated
290	TCONS_00206433	ENSG00000169247	SH3TC2	chr5:148826512-149063163(-)	SH3 domain and tetratricopeptide repeats 2	editing	2.17	6.55448e-11	upregulated
291	ENST00000358776	ENSG00000196177	ACADSB	chr10:123009015-123058311(+)	acyl-CoA dehydrogenase, short/branched chain	miRNA	1.56	4.338e-07	upregulated
292	TCONS_00041546	ENSG00000110315	RNF141	chr11:10450925-10547263(-)	ring finger protein 141	SMD, editing	1.55	8.26216e-07	upregulated
293	TCONS_00150625	ENSG00000115652	UXS1	chr2:106079874-106178703(-)	UDP-glucuronate decarboxylase 1	editing	2.16	1.35355e-12	upregulated
294	TCONS_00211163	ENSG00000119900	OGFRL1	chr6:71288802-71316359(+)	opioid growth factor receptor-like 1	SMD, miRNA	1.63	0.000143997	upregulated
295	TCONS_00247594	ENSG00000106714	CNTNAP3	chr9:39115471-39288315(-)	contactin associated protein-like 3	editing	1.72	1.04635e-07	upregulated
296	TCONS_00147745	ENSG00000237320	AC019064.1	chr2:34974211-35059914(-)		SMD	2.9	1.86516e-09	upregulated
297	TCONS_00230811	ENSG00000135253	KCP	chr7:128870010-128910719(-)	kielin/chordin-like protein	editing	2.23	0.000197794	upregulated
298	ENST00000555658	ENSG00000053254	FOXN3	chr14:89263592-89350791(-)	forkhead box N3	splicing	1.85	6.278e-09	upregulated
299	TCONS_00150696	ENSG00000186522	SEPT10	chr2:109530001-109614245(-)	septin 10	editing	1.8	2.69715e-09	downregulated
300	TCONS_00028040	ENSG00000134461	ANKRD16	chr10:5860030-5889906(-)	ankyrin repeat domain 16	editing	1.63	3.31513e-06	upregulated
301	TCONS_00187473	ENSG00000163071	SPATA18	chr4:52077343-52101925(+)	spermatogenesis associated 18	editing	1.87	7.3164e-22	downregulated
302	TCONS_00041545	ENSG00000110315	RNF141	chr11:10450925-10541267(-)	ring finger protein 141	SMD, editing	1.55	8.26216e-07	upregulated
303	ENST00000463496	ENSG00000106546	AHR	chr7:17298682-17346152(+)	aryl hydrocarbon receptor	splicing	2.03	1.23001e-11	downregulated
304	TCONS_00033132	ENSG00000179532	DNHD1	chr11:6481446-6552986(+)	dynein heavy chain domain 1	SMD, editing	1.45	0.000137902	upregulated
305	ENST00000227155	ENSG00000085117	CD82	chr11:44565590-44620363(+)	CD82 molecule	SMD, editing	1.52	0.000108682	upregulated
306	TCONS_00114628	ENSG00000161542	PRPSAP1	chr17:76300858-76330993(-)	phosphoribosyl pyrophosphate synthetase-associated protein 1	editing	2.06	9.2863e-18	upregulated
307	TCONS_00150051	ENSG00000174501	ANKRD36C	chr2:95809336-95991853(-)	ankyrin repeat domain 36C	editing, miRNA	2.01	3.09965e-22	downregulated
308	ENST00000478730	ENSG00000160991	ORAI2	chr7:102433569-102451609(+)	ORAI calcium release-activated calcium modulator 2	SMD, editing, miRNA	2.52	1.99865e-10	downregulated
309	TCONS_00242953	ENSG00000183148	ANKRD20A2	chr9:40223284-40344944(+)	ankyrin repeat domain 20 family, member A2	SMD	2.58	1.89932e-05	upregulated
310	TCONS_00020748	ENSG00000254154	RP4-798P15.3	chr1:177912410-178038007(-)		SMD	2.06	6.20917e-06	upregulated
311	ENST00000614987	ENSG00000100784	RPS6KA5	chr14:90847861-91060608(-)	ribosomal protein S6 kinase, 90kDa, polypeptide 5	editing	1.84	0.000481951	upregulated
312	ENST00000383791	ENSG00000131370	SH3BP5	chr3:15254852-15332629(-)	SH3-domain binding protein 5 (BTK-associated)	splicing	4.12	2.1211e-18	downregulated
313	TCONS_00056991	ENSG00000151491	EPS8	chr12:15665348-15712993(-)	epidermal growth factor receptor pathway substrate 8	SMD, editing	3.24	2.88995e-07	downregulated
314	ENST00000594295	ENSG00000197608	ZNF841	chr19:52064465-52094105(-)	zinc finger protein 841	SMD, editing	1.54	2.58945e-14	downregulated
315	ENST00000309060	ENSG00000174306	ZHX3	chr20:41178447-41300078(-)	zinc fingers and homeoboxes 3	SMD	1.8	6.58911e-08	upregulated
316	TCONS_00118582	ENSG00000101624	CEP76	chr18:12660537-12702777(-)	centrosomal protein 76kDa	editing	1.71	0.0002146	upregulated
317	ENST00000581897	ENSG00000266338	NBPF15	chr1:144421385-144456805(-)	neuroblastoma breakpoint family, member 15	splicing	2.12	4.99384e-08	downregulated
318	TCONS_00006772	ENSG00000275557	RP11-353N4.6	chr1:149607031-149635569(+)		SMD, editing	1.93	2.36653e-10	downregulated
319	TCONS_00066624	ENSG00000102547	CAB39L	chr13:49307021-49444208(-)	calcium binding protein 39-like	SMD	1.88	4.19363e-07	upregulated
320	TCONS_00140732	ENSG00000071051	NCK2	chr2:105745555-105909677(+)	NCK adaptor protein 2	splicing, editing	1.4	4.51385e-05	upregulated
321	ENST00000262134	ENSG00000087253	LPCAT2	chr16:55508997-55586670(+)	lysophosphatidylcholine acyltransferase 2	SMD	4.67	1.34312e-21	downregulated
322	TCONS_00083122	ENSG00000067369	TP53BP1	chr15:43392359-43493171(-)	tumor protein p53 binding protein 1	SMD	1.37	6.19998e-09	downregulated
323	ENST00000620139	ENSG00000118242	MREG	chr2:215942804-216013613(-)	melanoregulin	splicing	1.62	0.000377474	upregulated
324	ENST00000393735	ENSG00000170615	SLC26A5	chr7:103352729-103446151(-)	solute carrier family 26 (anion exchanger), member 5	splicing	2.56	6.08724e-07	upregulated
325	TCONS_00243489	ENSG00000099139	PCSK5	chr9:75889162-76063482(+)	proprotein convertase subtilisin/kexin type 5	editing	1.59	6.41234e-05	upregulated
326	ENST00000507297	ENSG00000184584	TMEM173	chr5:139475533-139482698(-)	transmembrane protein 173	splicing	2.5	0.000246029	downregulated
327	TCONS_00245543	ENSG00000204054	LINC00963	chr9:129488544-129512679(+)	long intergenic non-protein coding RNA 963	editing	2.19	1.00588e-21	downregulated
328	TCONS_00225256	ENSG00000159860	FAM115D	chr7:143792187-143836746(+)	family with sequence similarity 115, member D (pseudogene)	splicing	1.75	3.08651e-11	upregulated
329	TCONS_00243482	ENSG00000134996	OSTF1	chr9:75088493-75241470(+)	osteoclast stimulating factor 1	SMD, editing	1.45	0.000129265	upregulated
330	ENST00000356454	ENSG00000198142	SOWAHC	chr2:109614333-109618990(+)	sosondowah ankyrin repeat domain family member C	SMD, editing	2.2	4.33113e-09	downregulated
331	TCONS_00080928	ENSG00000140600	SH3GL3	chr15:83447227-83618786(+)	SH3-domain GRB2-like 3	editing	3.07	4.03478e-05	upregulated
332	TCONS_00237101	ENSG00000164733	CTSB	chr8:11802720-11868229(-)	cathepsin B	editing	1.86	6.11194e-10	downregulated
333	TCONS_00237103	ENSG00000164733	CTSB	chr8:11802720-11868229(-)	cathepsin B	editing	1.86	6.11194e-10	downregulated
334	ENST00000608958	ENSG00000145391	SETD7	chr4:139596607-139606699(-)	SET domain containing (lysine methyltransferase) 7	SMD	1.65	5.28614e-07	upregulated
335	ENST00000513333	ENSG00000129595	EPB41L4A	chr5:112195660-112206062(-)	erythrocyte membrane protein band 4.1 like 4A	splicing	1.4	0.000151821	upregulated
336	ENST00000448504	ENSG00000141337	ARSG	chr17:68259181-68422731(+)	arylsulfatase G	editing	1.62	9.2982e-05	upregulated
337	TCONS_00061878	ENSG00000198270	TMEM116	chr12:111958333-112006126(-)	transmembrane protein 116	SMD, editing	1.51	2.38006e-06	upregulated
338	ENST00000375234	ENSG00000158122	AAED1	chr9:96639576-96655281(-)	AhpC/TSA antioxidant enzyme domain containing 1	SMD, editing	2.26	4.37424e-10	downregulated
339	TCONS_00165713	ENSG00000182541	LIMK2	chr22:31212222-31289398(+)	LIM domain kinase 2	editing	1.48	9.57559e-08	downregulated
340	TCONS_00109814	ENSG00000267644	CTD-2008P7.10	chr17:28208400-28224015(-)		splicing	1.74	0.000748568	upregulated
341	TCONS_00082423	ENSG00000223509	RP11-632K20.7	chr15:32514863-32536926(-)		splicing, editing	1.55	0.0020992	downregulated
342	ENST00000618938	ENSG00000144724	PTPRG	chr3:61989620-62294898(+)	protein tyrosine phosphatase, receptor type, G	splicing	4.06	1.59134e-13	downregulated
343	TCONS_00199451	ENSG00000064651	SLC12A2	chr5:128083765-128126938(+)	solute carrier family 12 (sodium/potassium/chloride transporter), member 2	editing	1.57	1.39776e-05	upregulated
344	ENST00000589403	ENSG00000074657	ZNF532	chr18:58939512-58940430(+)	zinc finger protein 532	editing	4.39	4.87808e-32	downregulated
345	TCONS_00194686	ENSG00000109381	ELF2	chr4:139115513-139176645(-)	E74-like factor 2 (ets domain transcription factor)	editing, miRNA	1.68	2.36084e-05	upregulated
346	ENST00000579685	ENSG00000154856	APCDD1	chr18:10472006-10487814(+)	adenomatosis polyposis coli down-regulated 1	splicing	6.5	9.64444e-21	downregulated
347	TCONS_00194682	ENSG00000109381	ELF2	chr4:139062436-139177218(-)	E74-like factor 2 (ets domain transcription factor)	editing	1.68	2.36084e-05	upregulated
348	TCONS_00226448	ENSG00000215018	COL28A1	chr7:7328748-7567001(-)	collagen, type XXVIII, alpha 1	splicing	1.8	1.08766e-05	upregulated
349	ENST00000475499	ENSG00000233836	RP11-255H23.2	chr19:23763011-23832196(+)		splicing	3.44	7.87526e-12	upregulated
350	TCONS_00057952	ENSG00000111371	SLC38A1	chr12:46177579-46275879(-)	solute carrier family 38, member 1	editing	1.49	0.000125333	upregulated
351	ENST00000372236	ENSG00000170734	POLH	chr6:43576149-43615660(+)	polymerase (DNA directed), eta	editing	1.43	6.10606e-07	downregulated
352	ENST00000261435	ENSG00000078177	N4BP2	chr4:40056825-40158252(+)	NEDD4 binding protein 2	SMD, editing	1.5	6.3055e-09	downregulated
353	ENST00000542869	ENSG00000101213	PTK6	chr20:63528000-63537354(-)	protein tyrosine kinase 6	SMD, editing	1.53	0.000102848	upregulated
354	TCONS_00213738	ENSG00000198721	ECI2	chr6:4113536-4135597(-)	enoyl-CoA delta isomerase 2	SMD, editing	1.62	0.000173993	upregulated
355	TCONS_00211226	ENSG00000229852	RP11-398K22.12	chr6:73278172-73303965(+)		editing	2	2.40392e-08	downregulated
356	TCONS_00010507	ENSG00000143499	SMYD2	chr1:214281036-214369703(+)	SET and MYND domain containing 2	SMD	1.61	1.06917e-07	downregulated
357	ENST00000426391	ENSG00000197608	ZNF841	chr19:52064465-52095765(-)	zinc finger protein 841	SMD, editing	1.54	2.58945e-14	downregulated
358	ENST00000409458	ENSG00000136235	GPNMB	chr7:23246708-23258048(+)	glycoprotein (transmembrane) nmb	SMD, editing	3.64	8.82757e-11	downregulated
359	TCONS_00006081	ENSG00000232499	RP11-512F24.1	chr1:113416469-113484672(+)		editing, miRNA	1.57	0.000135815	upregulated
360	ENST00000357164	ENSG00000196743	GM2A	chr5:151252891-151270440(+)	GM2 ganglioside activator	editing, miRNA	1.67	1.56968e-07	downregulated
361	TCONS_00101152	ENSG00000133030	MPRIP	chr17:17042544-17206064(+)	myosin phosphatase Rho interacting protein	editing	1.53	8.22695e-05	upregulated
362	TCONS_00119049	ENSG00000141441	GAREM	chr18:32240294-32470491(-)	GRB2 associated, regulator of MAPK1	SMD, editing	1.55	0.000672401	upregulated
363	TCONS_00020519	ENSG00000231424	RP1-45C12.1	chr1:171155495-171251839(-)		SMD	3.29	9.776e-31	downregulated
364	TCONS_00025775	ENSG00000108175	ZMIZ1	chr10:79103602-79279060(+)	zinc finger, MIZ-type containing 1	SMD, editing	2.38	2.59596e-08	upregulated
365	ENST00000324537	ENSG00000140600	SH3GL3	chr15:83447530-83618739(+)	SH3-domain GRB2-like 3	splicing	3.07	4.03478e-05	upregulated
366	TCONS_00184374	ENSG00000144959	NCEH1	chr3:172628239-172713947(-)	neutral cholesterol ester hydrolase 1	SMD, editing	2.26	3.34339e-12	upregulated
367	TCONS_00009128	ENSG00000179452	GM140	chr1:181235328-181426457(+)	uncharacterized LOC100287948	splicing	2.54	0.00323044	upregulated
368	TCONS_00197324	ENSG00000130449	ZSWIM6	chr5:61332269-61553568(+)	zinc finger, SWIM-type containing 6	editing	1.42	0.000129479	downregulated
369	TCONS_00154878	ENSG00000163359	COL6A3	chr2:237323296-237414375(-)	collagen, type VI, alpha 3	editing	4.45	1.2632e-11	downregulated
370	TCONS_00165090	ENSG00000258555	SPECC1L-ADORA2A	chr22:24270816-24423028(+)	SPECC1L-ADORA2A readthrough (NMD candidate)	editing	1.64	6.47039e-06	upregulated
371	TCONS_00202828	ENSG00000150712	MTMR12	chr5:32225283-32313012(-)	myotubularin related protein 12	editing	1.37	1.22773e-07	upregulated
372	TCONS_00243475	ENSG00000134996	OSTF1	chr9:75077489-75241470(+)	osteoclast stimulating factor 1	editing, SMD	1.45	0.000129265	upregulated
373	ENST00000510011	ENSG00000245958	RP11-33B1.1	chr4:119454819-119497903(+)		splicing	1.54	0.000357639	upregulated
374	TCONS_00170642	ENSG00000131389	SLC6A6	chr3:14402560-14494180(+)	solute carrier family 6 (neurotransmitter transporter), member 6	SMD	1.84	9.65855e-06	downregulated
375	TCONS_00118919	ENSG00000134504	KCTD1	chr18:26450184-26549435(-)	potassium channel tetramerization domain containing 1	SMD, editing	1.5	2.45187e-08	upregulated
376	ENST00000263026	ENSG00000103319	EEF2K	chr16:22206281-22288732(+)	eukaryotic elongation factor-2 kinase	editing, miRNA	1.51	7.37041e-06	upregulated
377	TCONS_00252827	ENSG00000082458	DLG3	chrX:70452304-70507273(+)	discs, large homolog 3 (Drosophila)	editing	1.73	2.78952e-10	upregulated
378	ENST00000435296	ENSG00000135245	HILPDA	chr7:128455848-128457924(+)	hypoxia inducible lipid droplet-associated	SMD, editing	1.68	3.27237e-06	upregulated
379	ENST00000568559	ENSG00000166822	TMEM170A	chr16:75443247-75464689(-)	transmembrane protein 170A	SMD, splicing, editing	1.48	1.38731e-09	upregulated
380	ENST00000339732	ENSG00000131386	GALNT15	chr3:16174648-16229746(+)	polypeptide N-acetylgalactosaminyltransferase 15	SMD, editing	3.06	4.39706e-09	downregulated
381	TCONS_00242952	ENSG00000183148	ANKRD20A2	chr9:40223284-40344944(+)	ankyrin repeat domain 20 family, member A2	SMD	2.58	1.89932e-05	upregulated
382	ENST00000345714	ENSG00000104205	SGK3	chr8:66793613-66862022(+)	serum/glucocorticoid regulated kinase family, member 3	editing	1.81	6.38539e-09	downregulated
383	ENST00000441159	ENSG00000170379	FAM115C	chr7:143621451-143730409(+)	family with sequence similarity 115, member C	splicing, miRNA	1.61	5.11374e-05	upregulated
384	TCONS_00220232	ENSG00000136261	BZW2	chr7:16661213-16706523(+)	basic leucine zipper and W2 domains 2	splicing	1.61	9.0336e-21	upregulated
385	TCONS_00018077	ENSG00000266338	NBPF15	chr1:144420702-144453564(-)	neuroblastoma breakpoint family, member 15	splicing, editing	2.12	4.99384e-08	downregulated
386	TCONS_00018078	ENSG00000266338	NBPF15	chr1:144420702-144461274(-)	neuroblastoma breakpoint family, member 15	splicing	2.12	4.99384e-08	downregulated
387	TCONS_00118361	ENSG00000154655	L3MBTL4	chr18:6072960-6414458(-)	l(3)mbt-like 4 (Drosophila)	SMD, editing	2.2	1.22572e-11	upregulated
388	ENST00000472528	ENSG00000163931	TKT	chr3:53231453-53255987(-)	transketolase	splicing	1.62	0.000321536	upregulated
389	TCONS_00247058	ENSG00000086062	B4GALT1	chr9:33110587-33167356(-)	UDP-Gal:betaGlcNAc beta 1,4- galactosyltransferase, polypeptide 1	editing	1.65	2.02761e-08	downregulated
390	TCONS_00187640	ENSG00000174799	CEP135	chr4:55948870-55966580(+)	centrosomal protein 135kDa	SMD	1.93	2.04012e-12	downregulated
391	ENST00000375120	ENSG00000169914	OTUD3	chr1:19882512-19912945(+)	OTU deubiquitinase 3	SMD	1.49	1.50994e-09	upregulated
392	TCONS_00185519	ENSG00000214135	AC024560.3	chr3:197590040-197627906(-)		SMD, editing	1.37	5.51356e-07	upregulated
393	ENST00000421840	ENSG00000238105	GOLGA2P5	chr12:100165047-100173245(-)	golgin A2 pseudogene 5	splicing	1.83	5.97411e-06	upregulated
394	TCONS_00148484	ENSG00000115380	EFEMP1	chr2:55856162-55924139(-)	EGF containing fibulin-like extracellular matrix protein 1	SMD	2.03	6.17643e-07	downregulated
395	TCONS_00185516	ENSG00000214135	AC024560.3	chr3:197590040-197627906(-)		SMD, editing	1.37	5.51356e-07	upregulated
396	ENST00000508593	ENSG00000163697	APBB2	chr4:40815323-41214532(-)	amyloid beta (A4) precursor protein-binding, family B, member 2	splicing	2.43	2.49422e-09	downregulated
397	TCONS_00189341	ENSG00000245958	RP11-33B1.1	chr4:119454790-119565906(+)		splicing, editing	1.54	0.000357639	upregulated
398	TCONS_00171086	ENSG00000152642	GPD1L	chr3:32106510-32168758(+)	glycerol-3-phosphate dehydrogenase 1-like	editing	2.17	1.29042e-10	upregulated
399	TCONS_00163686	ENSG00000171587	DSCAM	chr21:40682833-40847139(-)	Down syndrome cell adhesion molecule	SMD	4.49	3.12021e-09	upregulated
400	TCONS_00098745	ENSG00000166822	TMEM170A	chr16:75439838-75464706(-)	transmembrane protein 170A	SMD, editing	1.48	1.38731e-09	upregulated
401	TCONS_00243507	ENSG00000099139	PCSK5	chr9:75890643-76304607(+)	proprotein convertase subtilisin/kexin type 5	SMD	1.59	6.41234e-05	upregulated
402	TCONS_00039637	ENSG00000110395	CBL	chr11:119206041-119290540(+)	Cbl proto-oncogene, E3 ubiquitin protein ligase	editing	1.73	7.3145e-08	upregulated
403	TCONS_00243503	ENSG00000099139	PCSK5	chr9:75890636-76304607(+)	proprotein convertase subtilisin/kexin type 5	SMD	1.59	6.41234e-05	upregulated
404	ENST00000333896	ENSG00000115306	SPTBN1	chr2:54558393-54662308(+)	spectrin, beta, non-erythrocytic 1	miRNA	1.68	2.26613e-05	downregulated
405	TCONS_00200902	ENSG00000196743	GM2A	chr5:151252891-151275731(+)	GM2 ganglioside activator	SMD, editing, miRNA	1.67	1.56968e-07	downregulated
406	TCONS_00200901	ENSG00000196743	GM2A	chr5:151252891-151275731(+)	GM2 ganglioside activator	SMD, editing, miRNA	1.67	1.56968e-07	downregulated
407	TCONS_00083752	ENSG00000128833	MYO5C	chr15:52233319-52295798(-)	myosin VC	SMD	1.7	0.00116646	upregulated
408	ENST00000320892	ENSG00000151692	RNF144A	chr2:6917391-7044182(+)	ring finger protein 144A	SMD, editing	1.55	6.69866e-08	upregulated
409	TCONS_00008734	ENSG00000094963	FMO2	chr1:171185151-171220322(+)	flavin containing monooxygenase 2 (non-functional)	splicing	2.74	2.60693e-18	downregulated
410	ENST00000368324	ENSG00000132718	SYT11	chr1:155859508-155885199(+)	synaptotagmin XI	SMD, editing	2.53	0.000300625	downregulated
411	ENST00000498535	ENSG00000133606	MKRN1	chr7:140459771-140479354(-)	makorin ring finger protein 1	splicing	1.46	3.05908e-07	upregulated
412	TCONS_00109000	ENSG00000175106	TVP23C	chr17:15426057-15563617(-)	trans-golgi network vesicle protein 23 homolog C (S. cerevisiae)	editing	1.42	0.000127496	upregulated
413	ENST00000585366	ENSG00000267136	RP11-53B2.3	chr18:13514519-13522888(-)		splicing	6.69	4.0318e-34	downregulated
414	ENST00000621003	ENSG00000129595	EPB41L4A	chr5:112162617-112419313(-)	erythrocyte membrane protein band 4.1 like 4A	splicing	1.4	0.000151821	upregulated
415	ENST00000425756	ENSG00000071051	NCK2	chr2:105851747-105881432(+)	NCK adaptor protein 2	splicing	1.4	4.51385e-05	upregulated
416	TCONS_00163485	ENSG00000159267	HLCS	chr21:36888504-36966355(-)	holocarboxylase synthetase (biotin-(proprionyl-CoA-carboxylase (ATP-hydrolysing)) ligase)	SMD, editing	1.43	9.31908e-05	upregulated
417	TCONS_00173891	ENSG00000201065	RNU6-461P	chr3:102746945-102808502(+)	RNA, U6 small nuclear 461, pseudogene	SMD	2.68	0.000235969	upregulated
418	TCONS_00163488	ENSG00000159267	HLCS	chr21:36888504-36990236(-)	holocarboxylase synthetase (biotin-(proprionyl-CoA-carboxylase (ATP-hydrolysing)) ligase)	SMD, editing	1.43	9.31908e-05	upregulated
419	TCONS_00000504	ENSG00000196581	AJAP1	chr1:4654731-4796457(+)	adherens junctions associated protein 1	editing	3.07	4.73744e-07	upregulated
420	TCONS_00171146	ENSG00000153558	FBXL2	chr3:33277421-33342876(+)	F-box and leucine-rich repeat protein 2	editing	2.2	2.23629e-08	downregulated
421	TCONS_00020722	ENSG00000254154	RP4-798P15.3	chr1:177912410-177973946(-)		SMD	2.06	6.20917e-06	upregulated
422	TCONS_00099312	ENSG00000103257	SLC7A5	chr16:87826363-87869488(-)	solute carrier family 7 (amino acid transporter light chain, L system), member 5	editing	1.79	7.71912e-07	upregulated
423	TCONS_00038235	ENSG00000150687	PRSS23	chr11:86800239-86954621(+)	protease, serine, 23	SMD	5.73	8.11338e-26	downregulated
424	ENST00000299157	ENSG00000166130	IKBIP	chr12:98624248-98645075(-)	IKBKB interacting protein	SMD, miRNA	2	3.44568e-11	downregulated
425	TCONS_00037377	ENSG00000172890	NADSYN1	chr11:71453108-71518852(+)	NAD synthetase 1	SMD, editing	1.52	2.38687e-07	upregulated
426	ENST00000373766	ENSG00000156711	MAPK13	chr6:36130483-36144524(+)	mitogen-activated protein kinase 13	editing	1.93	1.4097e-09	upregulated
427	ENST00000510844	ENSG00000245958	RP11-33B1.1	chr4:119494425-119519566(+)		splicing	1.54	0.000357639	upregulated
428	TCONS_00205177	ENSG00000168938	PPIC	chr5:122949274-123040634(-)	peptidylprolyl isomerase C (cyclophilin C)	SMD	2.07	2.01111e-18	downregulated
429	TCONS_00038233	ENSG00000150687	PRSS23	chr11:86800239-86879528(+)	protease, serine, 23	editing	5.73	8.11338e-26	downregulated
430	TCONS_00074894	ENSG00000258561	RP11-72M17.1	chr14:66362118-66545208(-)		editing, SMD	1.55	5.69437e-08	upregulated
431	TCONS_00244326	ENSG00000106799	TGFBR1	chr9:99105815-99159957(+)	transforming growth factor, beta receptor 1	editing	1.69	1.32356e-08	downregulated
432	TCONS_00177356	ENSG00000196083	IL1RAP	chr3:190513998-190632445(+)	interleukin 1 receptor accessory protein	SMD	2.29	1.2361e-13	downregulated
433	TCONS_00163350	ENSG00000159216	RUNX1	chr21:34785168-34888854(-)	runt-related transcription factor 1	editing	3.61	5.75118e-09	downregulated
434	ENST00000366542	ENSG00000143702	CEP170	chr1:243124427-243255050(-)	centrosomal protein 170kDa	splicing	1.89	7.07426e-14	downregulated
435	TCONS_00163352	ENSG00000159216	RUNX1	chr21:34785168-34888858(-)	runt-related transcription factor 1	editing	3.61	5.75118e-09	downregulated
436	TCONS_00145814	ENSG00000115648	MLPH	chr2:237485427-237516902(+)	melanophilin	SMD	1.81	7.4831e-07	upregulated
437	TCONS_00249092	ENSG00000106771	TMEM245	chr9:109013705-109120106(-)	transmembrane protein 245	editing	1.47	0.000201018	upregulated
438	TCONS_00159952	ENSG00000174306	ZHX3	chr20:41197409-41272273(-)	zinc fingers and homeoboxes 3	SMD, editing	1.8	6.58911e-08	upregulated
439	TCONS_00159951	ENSG00000174306	ZHX3	chr20:41197409-41271107(-)	zinc fingers and homeoboxes 3	SMD, editing	1.8	6.58911e-08	upregulated
440	ENST00000594012	ENSG00000198521	ZNF43	chr19:21804949-21852017(-)	zinc finger protein 43	splicing, editing	1.36	6.80853e-07	downregulated
441	TCONS_00235205	ENSG00000104413	ESRP1	chr8:94635184-94707470(+)	epithelial splicing regulatory protein 1	SMD, editing	1.43	0.000117725	upregulated
442	ENST00000367590	ENSG00000143324	XPR1	chr1:180632003-180890251(+)	xenotropic and polytropic retrovirus receptor 1	SMD, editing, miRNA	1.81	4.338e-07	downregulated
443	ENST00000396349	ENSG00000111261	MANSC1	chr12:12329264-12350241(-)	MANSC domain containing 1	SMD, editing	1.54	3.26901e-05	upregulated
444	TCONS_00182614	ENSG00000241288	RP11-379B18.5	chr3:125770877-125915782(-)		SMD, editing	2.26	1.79181e-05	upregulated
445	TCONS_00084314	ENSG00000069667	RORA	chr15:60487792-60515882(-)	RAR-related orphan receptor A	editing	1.88	5.06176e-06	upregulated
446	TCONS_00101175	ENSG00000133030	MPRIP	chr17:17042544-17206064(+)	myosin phosphatase Rho interacting protein	editing	1.53	8.22695e-05	upregulated
447	TCONS_00182613	ENSG00000241288	RP11-379B18.5	chr3:125770877-125915782(-)		SMD, editing	2.26	1.79181e-05	upregulated
448	TCONS_00079955	ENSG00000187720	THSD4	chr15:71096951-71416270(+)	thrombospondin, type I, domain containing 4	SMD	3.88	1.37842e-10	downregulated
449	ENST00000265981	ENSG00000110315	RNF141	chr11:10511677-10541217(-)	ring finger protein 141	editing	1.55	8.26216e-07	upregulated
450	ENST00000353047	ENSG00000164733	CTSB	chr8:11842523-11868229(-)	cathepsin B	SMD, editing	1.86	6.11194e-10	downregulated
451	TCONS_00009136	ENSG00000198216	CACNA1E	chr1:181236082-181652094(+)	calcium channel, voltage-dependent, R type, alpha 1E subunit	splicing	2.66	5.21558e-05	upregulated
452	TCONS_00190799	ENSG00000109762	SNX25	chr4:185204236-185375483(+)	sorting nexin 25	editing	1.51	5.33276e-06	upregulated
453	TCONS_00168418	ENSG00000167065	DUSP18	chr22:30653527-30667946(-)	dual specificity phosphatase 18	editing	1.51	1.38838e-06	downregulated
454	TCONS_00189333	ENSG00000245958	RP11-33B1.1	chr4:119454790-119565906(+)		splicing, editing	1.54	0.000357639	upregulated
455	ENST00000583694	ENSG00000139132	FGD4	chr12:32502216-32576448(+)	FYVE, RhoGEF and PH domain containing 4	splicing	1.44	1.11996e-08	upregulated
456	ENST00000470361	ENSG00000197584	KCNMB2	chr3:178536235-178824680(+)	potassium large conductance calcium-activated channel, subfamily M, beta member 2	splicing	2.07	0.000768208	upregulated
457	TCONS_00210637	ENSG00000170734	POLH	chr6:43576148-43624085(+)	polymerase (DNA directed), eta	editing, SMD, miRNA	1.43	6.10606e-07	downregulated
458	TCONS_00046540	ENSG00000149212	SESN3	chr11:95156203-95231197(-)	sestrin 3	SMD, editing	2.89	8.2543e-17	downregulated
459	TCONS_00053527	ENSG00000151572	ANO4	chr12:101064105-101130929(+)	anoctamin 4	SMD	7.09	3.33032e-20	upregulated
460	TCONS_00104867	ENSG00000108924	HLF	chr17:55265011-55329480(+)	hepatic leukemia factor	editing	2.92	3.79974e-06	upregulated
461	TCONS_00214444	ENSG00000235109	ZSCAN31	chr6:28300705-28358843(-)	zinc finger and SCAN domain containing 31	SMD	1.92	3.20285e-06	downregulated
462	TCONS_00061180	ENSG00000238105	GOLGA2P5	chr12:100152861-100196976(-)	golgin A2 pseudogene 5	splicing	1.83	5.97411e-06	upregulated
463	ENST00000506202	ENSG00000174799	CEP135	chr4:55964865-56033104(+)	centrosomal protein 135kDa	editing	1.93	2.04012e-12	downregulated
464	TCONS_00053521	ENSG00000151572	ANO4	chr12:100990001-101130929(+)	anoctamin 4	SMD	7.09	3.33032e-20	upregulated
465	ENST00000474889	ENSG00000144724	PTPRG	chr3:61561910-62297613(+)	protein tyrosine phosphatase, receptor type, G	splicing	4.06	1.59134e-13	downregulated
466	TCONS_00218568	ENSG00000016402	IL20RA	chr6:136982164-137060586(-)	interleukin 20 receptor, alpha	splicing	1.79	7.5413e-08	upregulated
467	TCONS_00161498	ENSG00000156273	BACH1	chr21:29463636-29672023(+)	BTB and CNC homology 1, basic leucine zipper transcription factor 1	SMD, editing	1.74	0.000562251	downregulated
468	ENST00000410023	ENSG00000115594	IL1R1	chr2:102142785-102179874(+)	interleukin 1 receptor, type I	SMD	3.24	1.72789e-12	downregulated
469	ENST00000257189	ENSG00000134757	DSG3	chr18:31447794-31478702(+)	desmoglein 3	SMD	3.72	2.28772e-06	downregulated
470	TCONS_00218562	ENSG00000016402	IL20RA	chr6:136982164-137044312(-)	interleukin 20 receptor, alpha	splicing	1.79	7.5413e-08	upregulated
471	TCONS_00105791	ENSG00000141337	ARSG	chr17:68291490-68435736(+)	arylsulfatase G	SMD, editing	1.62	9.2982e-05	upregulated
472	TCONS_00231159	ENSG00000146858	ZC3HAV1L	chr7:139021721-139036362(-)	zinc finger CCCH-type, antiviral 1-like	editing	2.23	2.00586e-10	downregulated
473	TCONS_00103554	ENSG00000037042	TUBG2	chr17:42659256-42670108(+)	tubulin, gamma 2	editing	1.55	0.00012413	downregulated
474	TCONS_00199320	ENSG00000064652	SNX24	chr5:122845448-122988905(+)	sorting nexin 24	editing	1.8	1.82567e-14	downregulated
475	TCONS_00027924	ENSG00000205696	ADARB2-AS1	chr10:1444842-1558242(-)	ADARB2 antisense RNA 1	editing	4.63	4.53522e-08	upregulated
476	TCONS_00137691	ENSG00000075426	FOSL2	chr2:28392702-28434292(+)	FOS-like antigen 2	editing	1.43	0.000414281	upregulated
477	ENST00000500576	ENSG00000214113	LYRM4	chr6:5186599-5260950(-)	LYR motif containing 4	splicing, editing	1.47	0.000152573	upregulated
478	ENST00000623817	ENSG00000280067	CTD-2600H12.2	chr16:48343754-48346058(-)		editing	1.71	5.92714e-10	upregulated
479	TCONS_00011154	ENSG00000010072	SPRTN	chr1:231322558-231374114(+)	SprT-like N-terminal domain	SMD	1.46	1.44005e-05	upregulated
480	ENST00000491995	ENSG00000242221	PSG2	chr19:43081786-43082668(-)	pregnancy specific beta-1-glycoprotein 2	splicing	3.22	1.23843e-10	downregulated
481	TCONS_00123899	ENSG00000205246	RPSAP58	chr19:23762943-23872835(+)	ribosomal protein SA pseudogene 58	SMD, editing, miRNA	2.15	4.60978e-17	upregulated
482	TCONS_00160558	ENSG00000054803	CBLN4	chr20:55967576-56035334(-)	cerebellin 4 precursor	SMD	2.44	0.00212971	upregulated
483	ENST00000554879	ENSG00000100731	PCNX	chr14:70907404-71012838(+)	pecanex homolog (Drosophila)	editing	1.38	1.42733e-06	downregulated
484	TCONS_00075339	ENSG00000119681	LTBP2	chr14:74494259-74616647(-)	latent transforming growth factor beta binding protein 2	SMD	4.81	8.51327e-12	downregulated
485	TCONS_00039782	ENSG00000023171	GRAMD1B	chr11:123520844-123634978(+)	GRAM domain containing 1B	editing	2.03	3.28996e-05	upregulated
486	TCONS_00132233	ENSG00000198521	ZNF43	chr19:21802524-21844892(-)	zinc finger protein 43	splicing, editing	1.36	6.80853e-07	downregulated
487	TCONS_00093946	ENSG00000261713	SSTR5-AS1	chr16:1076329-1079904(-)	SSTR5 antisense RNA 1	SMD	2.51	0.00161347	upregulated
488	ENST00000550527	ENSG00000120868	APAF1	chr12:98648352-98735426(+)	apoptotic peptidase activating factor 1	editing	1.4	7.98559e-05	downregulated
489	TCONS_00215909	ENSG00000124596	OARD1	chr6:41041371-41073073(-)	O-acyl-ADP-ribose deacylase 1	SMD	1.46	1.95239e-05	upregulated
490	TCONS_00226450	ENSG00000215018	COL28A1	chr7:7328748-7567001(-)	collagen, type XXVIII, alpha 1	splicing	1.8	1.08766e-05	upregulated
491	ENST00000382044	ENSG00000067369	TP53BP1	chr15:43403060-43493171(-)	tumor protein p53 binding protein 1	SMD	1.37	6.19998e-09	downregulated
492	TCONS_00190498	ENSG00000129116	PALLD	chr4:168654712-168733200(+)	palladin, cytoskeletal associated protein	editing	3.34	4.41038e-10	downregulated
493	TCONS_00005324	ENSG00000117569	PTBP2	chr1:96721664-96824906(+)	polypyrimidine tract binding protein 2	editing	1.59	6.04103e-07	downregulated
494	ENST00000471224	ENSG00000233836	RP11-255H23.2	chr19:23762943-23832196(+)		splicing	3.44	7.87526e-12	upregulated
495	TCONS_00005323	ENSG00000117569	PTBP2	chr1:96721664-96824906(+)	polypyrimidine tract binding protein 2	editing	1.59	6.04103e-07	downregulated
496	ENST00000512395	ENSG00000129595	EPB41L4A	chr5:112262552-112392784(-)	erythrocyte membrane protein band 4.1 like 4A	splicing	1.4	0.000151821	upregulated
497	ENST00000327268	ENSG00000108932	SLC16A6	chr17:68267025-68291116(-)	solute carrier family 16, member 6	splicing	1.85	3.02506e-08	upregulated
498	ENST00000598368	ENSG00000269609	RPARP-AS1	chr10:102453839-102456292(+)	RPARP antisense RNA 1	editing	1.51	1.63107e-05	upregulated
499	TCONS_00244067	ENSG00000165238	WNK2	chr9:93184915-93346597(+)	WNK lysine deficient protein kinase 2	editing	2.2	5.51343e-12	upregulated
500	TCONS_00090941	ENSG00000102900	NUP93	chr16:56781657-56850286(+)	nucleoporin 93kDa	editing, SMD	1.64	1.19592e-06	upregulated
501	TCONS_00147093	ENSG00000119778	ATAD2B	chr2:23714475-23927138(-)	ATPase family, AAA domain containing 2B	SMD, editing	1.47	3.67862e-05	upregulated
502	ENST00000361752	ENSG00000112531	QKI	chr6:163414642-163578596(+)	QKI, KH domain containing, RNA binding	miRNA	1.85	7.66397e-08	downregulated
503	ENST00000490103	ENSG00000100296	THOC5	chr22:29505878-29553782(-)	THO complex 5	SMD, editing	1.49	2.21623e-07	upregulated
504	TCONS_00230128	ENSG00000170615	SLC26A5	chr7:103395548-103446667(-)	solute carrier family 26 (anion exchanger), member 5	splicing, editing	2.56	6.08724e-07	upregulated
505	ENST00000623752	ENSG00000279776	RP1-86D1.3	chr6:128447397-128449301(-)		editing	1.85	3.85753e-05	downregulated
506	TCONS_00032151	ENSG00000237489	LINC00959	chr10:130062263-130110817(-)	long intergenic non-protein coding RNA 959	splicing	1.66	1.18823e-07	upregulated
507	TCONS_00147826	ENSG00000163171	CDC42EP3	chr2:37635794-37672535(-)	CDC42 effector protein (Rho GTPase binding) 3	SMD	2.08	7.8687e-07	downregulated
508	ENST00000361758	ENSG00000112531	QKI	chr6:163413999-163573800(+)	QKI, KH domain containing, RNA binding	miRNA	1.85	7.66397e-08	downregulated
509	TCONS_00163084	ENSG00000156299	TIAM1	chr21:31096883-31353806(-)	T-cell lymphoma invasion and metastasis 1	editing	1.45	0.000101892	upregulated
510	ENST00000529743	ENSG00000254973	RP11-429J17.7	chr8:143758152-143771822(-)		editing	1.89	0.000148057	upregulated
511	ENST00000514920	ENSG00000163697	APBB2	chr4:40823643-40842516(-)	amyloid beta (A4) precursor protein-binding, family B, member 2	splicing	2.43	2.49422e-09	downregulated
512	TCONS_00235225	ENSG00000104413	ESRP1	chr8:94640936-94707470(+)	epithelial splicing regulatory protein 1	editing	1.43	0.000117725	upregulated
513	TCONS_00000720	ENSG00000234546	RP3-510D11.2	chr1:9146356-9190264(+)		SMD, editing	3.18	3.27232e-18	downregulated
514	TCONS_00109009	ENSG00000175106	TVP23C	chr17:15465174-15563611(-)	trans-golgi network vesicle protein 23 homolog C (S. cerevisiae)	splicing, editing	1.42	0.000127496	upregulated
515	TCONS_00001483	ENSG00000169914	OTUD3	chr1:19887105-19918048(+)	OTU deubiquitinase 3	SMD	1.49	1.50994e-09	upregulated
516	TCONS_00232466	ENSG00000104723	TUSC3	chr8:15540222-15790116(+)	tumor suppressor candidate 3	SMD	1.83	6.85022e-06	downregulated
517	ENST00000620340	ENSG00000072133	RPS6KA6	chrX:84058345-84186141(-)	ribosomal protein S6 kinase, 90kDa, polypeptide 6	SMD, editing	2.09	3.58663e-06	upregulated
518	ENST00000283254	ENSG00000153253	SCN3A	chr2:165087529-165204043(-)	sodium channel, voltage-gated, type III, alpha subunit	splicing	3.87	1.26338e-06	upregulated
519	TCONS_00240832	ENSG00000153317	ASAP1	chr8:130108786-130386877(-)	ArfGAP with SH3 domain, ankyrin repeat and PH domain 1	SMD, editing	1.89	3.39878e-22	downregulated
520	TCONS_00180673	ENSG00000163931	TKT	chr3:53196189-53256052(-)	transketolase	splicing	1.62	0.000321536	upregulated
521	TCONS_00240688	ENSG00000170873	MTSS1	chr8:124599548-124728768(-)	metastasis suppressor 1	SMD, editing	1.52	2.44459e-05	upregulated
522	ENST00000515047	ENSG00000129595	EPB41L4A	chr5:112170008-112205502(-)	erythrocyte membrane protein band 4.1 like 4A	splicing	1.4	0.000151821	upregulated
523	ENST00000436344	ENSG00000108244	KRT23	chr17:40922699-40937450(-)	keratin 23 (histone deacetylase inducible)	splicing	4.01	1.8123e-06	downregulated
524	TCONS_00240685	ENSG00000170873	MTSS1	chr8:124572812-124728499(-)	metastasis suppressor 1	SMD	1.52	2.44459e-05	upregulated
525	TCONS_00090929	ENSG00000102900	NUP93	chr16:56730104-56850286(+)	nucleoporin 93kDa	editing, SMD	1.64	1.19592e-06	upregulated
526	TCONS_00247617	ENSG00000204837	RP11-204M4.2	chr9:39794412-39834981(-)		SMD, editing	1.65	0.000173993	upregulated
527	ENST00000588883	ENSG00000167380	ZNF226	chr19:44165100-44178381(+)	zinc finger protein 226	SMD	1.43	2.04588e-05	upregulated
528	ENST00000507831	ENSG00000163697	APBB2	chr4:40823665-40890914(-)	amyloid beta (A4) precursor protein-binding, family B, member 2	splicing	2.43	2.49422e-09	downregulated
529	TCONS_00243271	ENSG00000260691	ANKRD20A1	chr9:67859062-67920634(+)	ankyrin repeat domain 20 family, member A1	SMD	2.4	3.64242e-07	upregulated
530	TCONS_00192163	ENSG00000163697	APBB2	chr4:41004861-41214619(-)	amyloid beta (A4) precursor protein-binding, family B, member 2	SMD, editing	2.43	2.49422e-09	downregulated
531	ENST00000498813	ENSG00000143753	DEGS1	chr1:224190135-224192440(+)	delta(4)-desaturase, sphingolipid 1	splicing	2.18	5.39429e-08	downregulated
532	TCONS_00025748	ENSG00000108175	ZMIZ1	chr10:79069034-79242840(+)	zinc finger, MIZ-type containing 1	SMD, editing	2.38	2.59596e-08	upregulated
533	TCONS_00067572	ENSG00000150401	DCUN1D2	chr13:113446240-113490379(-)	DCN1, defective in cullin neddylation 1, domain containing 2	editing	1.47	3.99101e-09	upregulated
534	ENST00000304748	ENSG00000171051	FPR1	chr19:51745171-51751909(-)	formyl peptide receptor 1	SMD	4.64	1.9306e-11	downregulated
535	ENST00000355285	ENSG00000154856	APCDD1	chr18:10454627-10489948(+)	adenomatosis polyposis coli down-regulated 1	SMD	6.5	9.64444e-21	downregulated
536	TCONS_00204914	ENSG00000129595	EPB41L4A	chr5:112198910-112421254(-)	erythrocyte membrane protein band 4.1 like 4A	editing	1.4	0.000151821	upregulated
537	ENST00000343110	ENSG00000188783	PRELP	chr1:203475827-203491352(+)	proline/arginine-rich end leucine-rich repeat protein	SMD, editing	3.58	1.03729e-05	downregulated
538	TCONS_00204916	ENSG00000129595	EPB41L4A	chr5:112231762-112421254(-)	erythrocyte membrane protein band 4.1 like 4A	editing	1.4	0.000151821	upregulated
539	ENST00000232564	ENSG00000114450	GNB4	chr3:179399201-179451590(-)	guanine nucleotide binding protein (G protein), beta polypeptide 4	SMD, editing	2.57	2.29681e-27	downregulated
540	TCONS_00204910	ENSG00000129595	EPB41L4A	chr5:112179150-112268878(-)	erythrocyte membrane protein band 4.1 like 4A	splicing, editing, SMD	1.4	0.000151821	upregulated
541	TCONS_00014134	ENSG00000084636	COL16A1	chr1:31649805-31704319(-)	collagen, type XVI, alpha 1	SMD	3.15	1.60913e-10	downregulated
542	ENST00000421422	ENSG00000174306	ZHX3	chr20:41178447-41204041(-)	zinc fingers and homeoboxes 3	SMD	1.8	6.58911e-08	upregulated
543	TCONS_00251973	ENSG00000171659	GPR34	chrX:41688918-41699542(+)	G protein-coupled receptor 34	SMD	4.15	3.05019e-23	downregulated
544	TCONS_00099311	ENSG00000103257	SLC7A5	chr16:87826363-87869488(-)	solute carrier family 7 (amino acid transporter light chain, L system), member 5	editing	1.79	7.71912e-07	upregulated
545	ENST00000513000	ENSG00000109452	INPP4B	chr4:142023159-142846290(-)	inositol polyphosphate-4-phosphatase, type II, 105kDa	SMD, editing	1.68	0.000118952	downregulated
546	ENST00000463954	ENSG00000103037	SETD6	chr16:58517466-58519076(+)	SET domain containing 6	editing	1.75	3.61054e-10	upregulated
547	ENST00000261653	ENSG00000111450	STX2	chr12:130789599-130839266(-)	syntaxin 2	SMD, editing	5.32	1.35303e-29	downregulated
548	ENST00000482603	ENSG00000137106	GRHPR	chr9:37429785-37432811(+)	glyoxylate reductase/hydroxypyruvate reductase	splicing	1.41	2.33422e-12	upregulated
549	ENST00000299213	ENSG00000166173	LARP6	chr15:70829129-70854159(-)	La ribonucleoprotein domain family, member 6	SMD	1.93	0.000422554	downregulated
550	ENST00000578119	ENSG00000266729	DSG1-AS1	chr18:31343383-31353936(-)	DSG1 antisense RNA 1	splicing	1.69	2.02053e-05	downregulated
551	ENST00000475187	ENSG00000100296	THOC5	chr22:29534537-29549144(-)	THO complex 5	splicing, editing	1.49	2.21623e-07	upregulated
552	TCONS_00118358	ENSG00000154655	L3MBTL4	chr18:6072960-6338680(-)	l(3)mbt-like 4 (Drosophila)	SMD, splicing, editing	2.2	1.22572e-11	upregulated
553	ENST00000484457	ENSG00000153558	FBXL2	chr3:33277421-33388092(+)	F-box and leucine-rich repeat protein 2	editing, SMD	2.2	2.23629e-08	downregulated
554	TCONS_00033409	ENSG00000133805	AMPD3	chr11:10450680-10535248(+)	adenosine monophosphate deaminase 3	SMD	1.59	0.000124005	upregulated
555	TCONS_00059488	ENSG00000170581	STAT2	chr12:56341585-56360163(-)	signal transducer and activator of transcription 2, 113kDa	SMD, editing, miRNA	2.02	5.97107e-10	downregulated
556	TCONS_00059489	ENSG00000170581	STAT2	chr12:56341585-56360163(-)	signal transducer and activator of transcription 2, 113kDa	SMD, editing, miRNA	2.02	5.97107e-10	downregulated
557	ENST00000620788	ENSG00000019144	PHLDB1	chr11:118650600-118657490(+)	pleckstrin homology-like domain, family B, member 1	editing	1.7	0.000186352	downregulated
558	TCONS_00004719	ENSG00000184005	ST6GALNAC3	chr1:76074703-76654449(+)	ST6 (alpha-N-acetyl-neuraminyl-2,3-beta-galactosyl-1,3)-N-acetylgalactosaminide alpha-2,6-sialyltransferase 3	editing	2.19	7.44694e-06	upregulated
559	TCONS_00059486	ENSG00000170581	STAT2	chr12:56341585-56360155(-)	signal transducer and activator of transcription 2, 113kDa	SMD, editing, miRNA	2.02	5.97107e-10	downregulated
560	TCONS_00059487	ENSG00000170581	STAT2	chr12:56341585-56360162(-)	signal transducer and activator of transcription 2, 113kDa	SMD, editing, miRNA	2.02	5.97107e-10	downregulated
561	ENST00000552220	ENSG00000257277	RP11-434H14.1	chr2:143676164-143741294(-)		splicing	2.18	1.88296e-06	downregulated
562	TCONS_00080691	ENSG00000235711	ANKRD34C	chr15:79209353-79300007(+)	ankyrin repeat domain 34C	splicing	1.84	3.90865e-05	upregulated
563	ENST00000396307	ENSG00000069974	RAB27A	chr15:55202965-55270394(-)	RAB27A, member RAS oncogene family	SMD, editing	2.48	8.48011e-08	downregulated
564	TCONS_00085508	ENSG00000169752	NRG4	chr15:75980940-76012444(-)	neuregulin 4	editing	2.04	1.0945e-05	upregulated
565	TCONS_00080692	ENSG00000235711	ANKRD34C	chr15:79209353-79300007(+)	ankyrin repeat domain 34C	splicing	1.84	3.90865e-05	upregulated
566	TCONS_00008606	ENSG00000197965	MPZL1	chr1:167721191-167792760(+)	myelin protein zero-like 1	editing	1.5	0.000124333	downregulated
567	ENST00000287675	ENSG00000157036	EXOG	chr3:38496271-38525951(+)	endo/exonuclease (5'-3'), endonuclease G-like	SMD, editing, miRNA	2.2	6.15692e-10	downregulated
568	TCONS_00191797	ENSG00000152990	GPR125	chr4:22384483-22516054(-)	G protein-coupled receptor 125	editing	1.77	1.00196e-05	downregulated
569	TCONS_00249683	ENSG00000173611	SCAI	chr9:124941153-125143496(-)	suppressor of cancer cell invasion	editing	1.54	0.000304323	upregulated
570	TCONS_00119512	ENSG00000184828	ZBTB7C	chr18:48276819-48409422(-)	zinc finger and BTB domain containing 7C	SMD, editing, miRNA	1.47	0.000292253	upregulated
571	TCONS_00210939	ENSG00000137269	LRRC1	chr6:53794496-54267120(+)	leucine rich repeat containing 1	splicing, editing	1.54	1.12874e-05	downregulated
572	TCONS_00037379	ENSG00000172890	NADSYN1	chr11:71453108-71524107(+)	NAD synthetase 1	splicing	1.52	2.38687e-07	upregulated
573	ENST00000307792	ENSG00000170381	SEMA3E	chr7:83363905-83649010(-)	sema domain, immunoglobulin domain (Ig), short basic domain, secreted, (semaphorin) 3E	SMD	2.67	0.000957108	upregulated
574	ENST00000370608	ENSG00000153898	MCOLN2	chr1:84925582-84996940(-)	mucolipin 2	SMD, editing	6.12	2.83234e-16	downregulated
575	TCONS_00180605	ENSG00000243696	RP5-966M1.6	chr3:52803010-52897596(-)	Uncharacterized protein {ECO:0000313|Ensembl:ENSP00000422253}	SMD	2.46	6.52091e-12	upregulated
576	ENST00000477205	ENSG00000148660	CAMK2G	chr10:73815866-73817782(-)	calcium/calmodulin-dependent protein kinase II gamma	editing	1.41	0.000119913	upregulated
577	ENST00000405000	ENSG00000152527	PLEKHH2	chr2:43637307-43765792(+)	pleckstrin homology domain containing, family H (with MyTH4 domain) member 2	editing	2.3	1.24566e-09	downregulated
578	TCONS_00057603	ENSG00000177359	RP11-551L14.1	chr12:31121025-31216304(-)		splicing	2.63	2.42045e-06	upregulated
579	TCONS_00057600	ENSG00000177359	RP11-551L14.1	chr12:31121025-31215557(-)		splicing	2.63	2.42045e-06	upregulated
580	TCONS_00057601	ENSG00000177359	RP11-551L14.1	chr12:31121025-31216250(-)		splicing, SMD	2.63	2.42045e-06	upregulated
581	TCONS_00257366	ENSG00000241743	RP5-964N17.1	chrX:113701658-113991964(-)		SMD, editing	3.33	1.1447e-06	upregulated
582	TCONS_00025805	ENSG00000108175	ZMIZ1	chr10:79279208-79319153(+)	zinc finger, MIZ-type containing 1	editing	2.38	2.59596e-08	upregulated
583	TCONS_00102930	ENSG00000274211	SOCS7	chr17:38352121-38406154(+)	suppressor of cytokine signaling 7	SMD, editing	1.63	0.000166224	upregulated
584	TCONS_00102933	ENSG00000274211	SOCS7	chr17:38352227-38406154(+)	suppressor of cytokine signaling 7	SMD, editing	1.63	0.000166224	upregulated
585	TCONS_00204540	ENSG00000175471	MCTP1	chr5:94994641-95081884(-)	multiple C2 domains, transmembrane 1	editing	1.61	0.00185794	upregulated
586	ENST00000261839	ENSG00000128833	MYO5C	chr15:52192321-52295798(-)	myosin VC	SMD	1.7	0.00116646	upregulated
587	TCONS_00039117	ENSG00000166741	NNMT	chr11:114295571-114325070(+)	nicotinamide N-methyltransferase	SMD	5.74	1.60769e-28	downregulated
588	TCONS_00076745	ENSG00000088808	PPP1R13B	chr14:103716259-103847590(-)	protein phosphatase 1, regulatory subunit 13B	editing	1.65	5.29118e-06	upregulated
589	ENST00000544440	ENSG00000005810	MYCBP2	chr13:77044654-77326679(-)	MYC binding protein 2, E3 ubiquitin protein ligase	splicing	1.38	1.18709e-05	upregulated
590	TCONS_00226468	ENSG00000272894	RP5-1159O4.1	chr7:7557505-7566996(-)		splicing	1.74	2.19636e-05	upregulated
591	ENST00000545369	ENSG00000159128	IFNGR2	chr21:33403440-33436944(+)	interferon gamma receptor 2 (interferon gamma transducer 1)	splicing	1.57	0.00166993	downregulated
592	TCONS_00053421	ENSG00000120868	APAF1	chr12:98645140-98735482(+)	apoptotic peptidase activating factor 1	editing	1.4	7.98559e-05	downregulated
593	TCONS_00244033	ENSG00000165238	WNK2	chr9:93184915-93346597(+)	WNK lysine deficient protein kinase 2	editing	2.2	5.51343e-12	upregulated
594	TCONS_00244030	ENSG00000165238	WNK2	chr9:93184915-93346597(+)	WNK lysine deficient protein kinase 2	editing	2.2	5.51343e-12	upregulated
595	ENST00000521027	ENSG00000156011	PSD3	chr8:18802275-18804874(-)	pleckstrin and Sec7 domain containing 3	splicing	1.71	1.0224e-08	downregulated
596	ENST00000539896	ENSG00000169403	PTAFR	chr1:28147165-28193936(-)	platelet-activating factor receptor	editing	1.63	3.70011e-06	upregulated
597	TCONS_00154892	ENSG00000163359	COL6A3	chr2:237323296-237414375(-)	collagen, type VI, alpha 3	editing	4.45	1.2632e-11	downregulated
598	ENST00000374580	ENSG00000204217	BMPR2	chr2:202376935-202567751(+)	bone morphogenetic protein receptor, type II (serine/threonine kinase)	SMD, editing	1.58	5.1875e-06	downregulated
599	TCONS_00015102	ENSG00000196517	SLC6A9	chr1:44016657-44031493(-)	solute carrier family 6 (neurotransmitter transporter, glycine), member 9	editing	2.38	2.66836e-07	upregulated
600	TCONS_00190504	ENSG00000129116	PALLD	chr4:168798389-168962111(+)	palladin, cytoskeletal associated protein	SMD	3.34	4.41038e-10	downregulated
601	TCONS_00225248	ENSG00000170379	FAM115C	chr7:143620942-143789406(+)	family with sequence similarity 115, member C	splicing, SMD, miRNA	1.61	5.11374e-05	upregulated
602	ENST00000370888	ENSG00000137269	LRRC1	chr6:53794979-53924121(+)	leucine rich repeat containing 1	splicing	1.54	1.12874e-05	downregulated
603	TCONS_00244038	ENSG00000165238	WNK2	chr9:93184915-93346597(+)	WNK lysine deficient protein kinase 2	editing	2.2	5.51343e-12	upregulated
604	TCONS_00047135	ENSG00000048028	USP28	chr11:113793935-113875319(-)	ubiquitin specific peptidase 28	editing	1.42	3.60598e-05	upregulated
605	ENST00000394622	ENSG00000157214	STEAP2	chr7:90211859-90237594(+)	STEAP family member 2, metalloreductase	SMD, editing	5.19	5.70533e-18	downregulated
606	TCONS_00225246	ENSG00000170379	FAM115C	chr7:143620919-143650799(+)	family with sequence similarity 115, member C	editing	1.61	5.11374e-05	upregulated
607	TCONS_00222619	ENSG00000005469	CROT	chr7:87345674-87410473(+)	carnitine O-octanoyltransferase	editing, SMD	1.61	6.53931e-06	downregulated
608	TCONS_00224726	ENSG00000122786	CALD1	chr7:134779218-134976470(+)	caldesmon 1	SMD	3.84	2.82822e-19	downregulated
609	ENST00000513738	ENSG00000151883	PARP8	chr5:50666966-50744828(+)	poly (ADP-ribose) polymerase family, member 8	splicing	1.85	3.12414e-08	downregulated
610	TCONS_00061864	ENSG00000198270	TMEM116	chr12:111917391-112013191(-)	transmembrane protein 116	SMD, editing	1.51	2.38006e-06	upregulated
611	TCONS_00222612	ENSG00000005469	CROT	chr7:87300470-87410473(+)	carnitine O-octanoyltransferase	SMD	1.61	6.53931e-06	downregulated
612	TCONS_00224728	ENSG00000122786	CALD1	chr7:134779419-134976470(+)	caldesmon 1	editing, SMD	3.84	2.82822e-19	downregulated
613	TCONS_00209602	ENSG00000244255	XXbac-BPG116M5.17	chr6:31919940-31981484(+)	Uncharacterized protein {ECO:0000313|Ensembl:ENSP00000410815}; cDNA FLJ55673, highly similar to Complement factor B {ECO:0000313|EMBL:BAG64956.1}	splicing	1.54	3.22217e-08	downregulated
614	ENST00000407633	ENSG00000136261	BZW2	chr7:16688524-16706197(+)	basic leucine zipper and W2 domains 2	splicing	1.61	9.0336e-21	upregulated
615	ENST00000507518	ENSG00000198189	HSD17B11	chr4:87336949-87373278(-)	hydroxysteroid (17-beta) dehydrogenase 11	splicing	3.19	1.17411e-13	downregulated
616	TCONS_00053512	ENSG00000151572	ANO4	chr12:100717676-100890024(+)	anoctamin 4	SMD	7.09	3.33032e-20	upregulated
617	TCONS_00053513	ENSG00000151572	ANO4	chr12:100717678-101130929(+)	anoctamin 4	SMD, editing	7.09	3.33032e-20	upregulated
618	ENST00000467513	ENSG00000133606	MKRN1	chr7:140459090-140478656(-)	makorin ring finger protein 1	splicing	1.46	3.05908e-07	upregulated
619	TCONS_00142538	ENSG00000233255	AC019181.2	chr2:164840748-165004762(+)		editing	3.4	1.57398e-10	upregulated
620	TCONS_00135884	ENSG00000197937	ZNF347	chr19:53134646-53159075(-)	zinc finger protein 347	splicing, editing	1.5	0.000486859	downregulated
621	ENST00000560870	ENSG00000259645	RP11-253M7.6	chr15:69391191-69392149(+)		splicing	1.9	0.00197228	upregulated
622	TCONS_00233718	ENSG00000169499	PLEKHA2	chr8:38910103-38973960(+)	pleckstrin homology domain containing, family A (phosphoinositide binding specific) member 2	editing	2.14	2.04012e-12	downregulated
623	TCONS_00069482	ENSG00000139946	PELI2	chr14:56118374-56326039(+)	pellino E3 ubiquitin protein ligase family member 2	editing	2.13	1.07891e-05	upregulated
624	TCONS_00167295	ENSG00000015475	BID	chr22:17726670-17774503(-)	BH3 interacting domain death agonist	SMD	1.6	0.00102906	upregulated
625	ENST00000504904	ENSG00000198046	ZNF667	chr19:56439324-56477330(-)	zinc finger protein 667	SMD	1.56	0.00106406	upregulated
626	TCONS_00248986	ENSG00000165152	TMEM246	chr9:101462809-101492066(-)	transmembrane protein 246	SMD	1.65	4.77031e-06	upregulated
627	TCONS_00140000	ENSG00000222041	LINC00152	chr2:87455367-87629159(+)	long intergenic non-protein coding RNA 152	SMD	3.74	1.21025e-11	downregulated
628	TCONS_00192159	ENSG00000163697	APBB2	chr4:40881604-41214618(-)	amyloid beta (A4) precursor protein-binding, family B, member 2	SMD, editing	2.43	2.49422e-09	downregulated
629	ENST00000518791	ENSG00000170379	FAM115C	chr7:143620954-143725081(+)	family with sequence similarity 115, member C	splicing	1.61	5.11374e-05	upregulated
630	TCONS_00057949	ENSG00000111371	SLC38A1	chr12:46177579-46269464(-)	solute carrier family 38, member 1	editing	1.49	0.000125333	upregulated
631	ENST00000549375	ENSG00000123352	SPATS2	chr12:49367461-49491159(+)	spermatogenesis associated, serine-rich 2	editing	1.75	1.12475e-05	downregulated
632	ENST00000290219	ENSG00000159128	IFNGR2	chr21:33402895-33437521(+)	interferon gamma receptor 2 (interferon gamma transducer 1)	splicing	1.57	0.00166993	downregulated
633	ENST00000257696	ENSG00000135245	HILPDA	chr7:128455890-128458416(+)	hypoxia inducible lipid droplet-associated	SMD, editing	1.68	3.27237e-06	upregulated
634	TCONS_00203663	ENSG00000213891	RPL3P6	chr5:61333372-61433984(-)	ribosomal protein L3 pseudogene 6	splicing, SMD	1.43	1.19973e-05	downregulated
635	TCONS_00142174	ENSG00000150556	LYPD6B	chr2:149045617-149220705(+)	LY6/PLAUR domain containing 6B	editing	1.76	0.00232761	upregulated
636	TCONS_00203988	ENSG00000198780	FAM169A	chr5:74832663-74859286(-)	family with sequence similarity 169, member A	splicing, editing	2.39	2.00921e-06	upregulated
637	ENST00000399322	ENSG00000136267	DGKB	chr7:14145048-14841450(-)	diacylglycerol kinase, beta 90kDa	SMD	3.26	1.59062e-05	upregulated
638	TCONS_00075813	ENSG00000053254	FOXN3	chr14:89137868-89325208(-)	forkhead box N3	editing, miRNA	1.85	6.278e-09	upregulated
639	TCONS_00225245	ENSG00000170379	FAM115C	chr7:143620912-143789406(+)	family with sequence similarity 115, member C	splicing, SMD, miRNA	1.61	5.11374e-05	upregulated
640	TCONS_00203984	ENSG00000198780	FAM169A	chr5:74803101-74859286(-)	family with sequence similarity 169, member A	splicing, editing	2.39	2.00921e-06	upregulated
641	TCONS_00203985	ENSG00000198780	FAM169A	chr5:74803101-74865937(-)	family with sequence similarity 169, member A	editing	2.39	2.00921e-06	upregulated
642	TCONS_00249090	ENSG00000106771	TMEM245	chr9:109013705-109120106(-)	transmembrane protein 245	editing	1.47	0.000201018	upregulated
643	ENST00000242057	ENSG00000106546	AHR	chr7:17298621-17346150(+)	aryl hydrocarbon receptor	SMD, editing	2.03	1.23001e-11	downregulated
644	TCONS_00070064	ENSG00000171723	GPHN	chr14:66505261-66948355(+)	gephyrin	editing	1.73	1.34281e-14	upregulated
645	TCONS_00175724	ENSG00000196428	TSC22D2	chr3:150386184-150471408(+)	TSC22 domain family, member 2	editing, SMD	1.51	2.32676e-05	downregulated
646	ENST00000391752	ENSG00000170889	RPS9	chr19:54200871-54207647(+)	ribosomal protein S9	miRNA	1.38	3.82599e-05	downregulated
647	ENST00000391753	ENSG00000170889	RPS9	chr19:54201132-54207647(+)	ribosomal protein S9	miRNA	1.38	3.82599e-05	downregulated
648	TCONS_00125532	ENSG00000167601	AXL	chr19:41226754-41262258(+)	AXL receptor tyrosine kinase	SMD, editing	2.07	5.78182e-07	downregulated
649	ENST00000591790	ENSG00000198046	ZNF667	chr19:56439324-56473068(-)	zinc finger protein 667	SMD	1.56	0.00106406	upregulated
650	TCONS_00154889	ENSG00000163359	COL6A3	chr2:237323296-237414375(-)	collagen, type VI, alpha 3	editing	4.45	1.2632e-11	downregulated
651	TCONS_00200499	ENSG00000145819	ARHGAP26	chr5:142770383-143160035(+)	Rho GTPase activating protein 26	SMD	3.39	1.40722e-17	downregulated
652	ENST00000360093	ENSG00000153253	SCN3A	chr2:165087521-165204067(-)	sodium channel, voltage-gated, type III, alpha subunit	splicing	3.87	1.26338e-06	upregulated
653	TCONS_00228184	ENSG00000106078	COBL	chr7:51015179-51048155(-)	cordon-bleu WH2 repeat protein	editing	1.61	2.66319e-07	upregulated
654	ENST00000513269	ENSG00000078177	N4BP2	chr4:40102906-40155397(+)	NEDD4 binding protein 2	SMD	1.5	6.3055e-09	downregulated
655	TCONS_00253258	ENSG00000102359	SRPX2	chrX:100644162-100685252(+)	sushi-repeat containing protein, X-linked 2	editing, SMD	2.84	4.13153e-15	downregulated
656	TCONS_00182611	ENSG00000241288	RP11-379B18.5	chr3:125770877-125915746(-)		SMD, editing	2.26	1.79181e-05	upregulated
657	ENST00000392373	ENSG00000111450	STX2	chr12:130790833-130839194(-)	syntaxin 2	SMD, editing	5.32	1.35303e-29	downregulated
658	ENST00000336824	ENSG00000075420	FNDC3B	chr3:172040553-172401665(+)	fibronectin type III domain containing 3B	SMD	1.98	4.15799e-20	downregulated
659	ENST00000422247	ENSG00000174799	CEP135	chr4:55948870-55960925(+)	centrosomal protein 135kDa	SMD, editing	1.93	2.04012e-12	downregulated
660	ENST00000592189	ENSG00000198046	ZNF667	chr19:56439329-56477367(-)	zinc finger protein 667	splicing, SMD	1.56	0.00106406	upregulated
661	ENST00000418314	ENSG00000128268	MGAT3	chr22:39477512-39487588(+)	mannosyl (beta-1,4-)-glycoprotein beta-1,4-N-acetylglucosaminyltransferase	splicing	2.24	1.5124e-08	upregulated
662	ENST00000621141	ENSG00000183671	GPR1	chr2:206175319-206213628(-)	G protein-coupled receptor 1	SMD, editing, miRNA	3.43	9.90578e-13	downregulated
663	TCONS_00043422	ENSG00000167987	VPS37C	chr11:61122296-61161186(-)	vacuolar protein sorting 37 homolog C (S. cerevisiae)	editing	1.47	8.3481e-06	upregulated
664	ENST00000391877	ENSG00000143753	DEGS1	chr1:224183265-224193157(+)	delta(4)-desaturase, sphingolipid 1	splicing	2.18	5.39429e-08	downregulated
665	TCONS_00235292	ENSG00000156170	NDUFAF6	chr8:95024985-95060062(+)	NADH dehydrogenase (ubiquinone) complex I, assembly factor 6	SMD	1.5	8.9267e-05	downregulated
666	ENST00000310455	ENSG00000173281	PPP1R3B	chr8:9136254-9150696(-)	protein phosphatase 1, regulatory subunit 3B	SMD, editing	4.18	1.05654e-15	downregulated
667	ENST00000397755	ENSG00000214189	ZNF788	chr19:12092335-12100788(+)	zinc finger family member 788	splicing, editing	1.79	2.17878e-12	downregulated
668	ENST00000552918	ENSG00000123352	SPATS2	chr12:49367509-49527226(+)	spermatogenesis associated, serine-rich 2	SMD, editing	1.75	1.12475e-05	downregulated
669	TCONS_00175246	ENSG00000174564	IL20RB	chr3:136967950-137167969(+)	interleukin 20 receptor beta	editing	1.44	0.00178542	upregulated
670	TCONS_00189336	ENSG00000245958	RP11-33B1.1	chr4:119454790-119565906(+)		splicing, editing	1.54	0.000357639	upregulated
671	TCONS_00022048	ENSG00000236230	RP11-400N13.1	chr1:221980137-222238598(-)		SMD	2.33	2.79014e-05	upregulated
672	TCONS_00017068	ENSG00000117519	CNN3	chr1:94892259-94931013(-)	calponin 3, acidic	SMD	2.58	9.52668e-25	downregulated
673	ENST00000338983	ENSG00000091436	PK	chr2:173075841-173227146(+)	Mitogen-activated protein kinase kinase kinase MLT	SMD	1.41	3.70996e-08	downregulated
674	ENST00000182527	ENSG00000065308	TRAM2	chr6:52497401-52576915(-)	translocation associated membrane protein 2	SMD	1.69	2.75748e-05	downregulated
675	ENST00000415318	ENSG00000248712	CCDC153	chr11:119190255-119196769(-)	coiled-coil domain containing 153	splicing	2.01	4.73138e-07	upregulated
676	TCONS_00214302	ENSG00000168405	CMAHP	chr6:25098077-25139236(-)	cytidine monophospho-N-acetylneuraminic acid hydroxylase, pseudogene	editing	3.35	5.79099e-09	downregulated
677	ENST00000588483	ENSG00000167460	TPM4	chr19:16080825-16086476(+)	tropomyosin 4	splicing	2.15	6.20221e-06	downregulated
678	TCONS_00196897	ENSG00000145623	OSMR	chr5:38839551-38906587(+)	oncostatin M receptor	SMD	3.84	3.87138e-22	downregulated
679	TCONS_00159938	ENSG00000174306	ZHX3	chr20:41165225-41300126(-)	zinc fingers and homeoboxes 3	SMD	1.8	6.58911e-08	upregulated
680	ENST00000511184	ENSG00000109381	ELF2	chr4:139101590-139177199(-)	E74-like factor 2 (ets domain transcription factor)	splicing	1.68	2.36084e-05	upregulated
681	TCONS_00193753	ENSG00000196344	ADH7	chr4:99389419-99436308(-)	alcohol dehydrogenase 7 (class IV), mu or sigma polypeptide	SMD	2.13	3.23783e-05	upregulated
682	TCONS_00067015	ENSG00000005810	MYCBP2	chr13:77035409-77327095(-)	MYC binding protein 2, E3 ubiquitin protein ligase	splicing	1.38	1.18709e-05	upregulated
683	TCONS_00109014	ENSG00000175106	TVP23C	chr17:15493768-15563611(-)	trans-golgi network vesicle protein 23 homolog C (S. cerevisiae)	SMD, editing	1.42	0.000127496	upregulated
684	TCONS_00109013	ENSG00000175106	TVP23C	chr17:15493768-15563611(-)	trans-golgi network vesicle protein 23 homolog C (S. cerevisiae)	SMD, editing	1.42	0.000127496	upregulated
685	TCONS_00109012	ENSG00000175106	TVP23C	chr17:15493768-15563611(-)	trans-golgi network vesicle protein 23 homolog C (S. cerevisiae)	SMD, editing	1.42	0.000127496	upregulated
686	TCONS_00109011	ENSG00000175106	TVP23C	chr17:15493768-15563604(-)	trans-golgi network vesicle protein 23 homolog C (S. cerevisiae)	SMD, splicing, editing	1.42	0.000127496	upregulated
687	TCONS_00152127	ENSG00000082438	COBLL1	chr2:164702022-164818466(-)	cordon-bleu WH2 repeat protein-like 1	SMD, editing	1.39	5.96905e-06	upregulated
688	TCONS_00152126	ENSG00000082438	COBLL1	chr2:164702022-164818466(-)	cordon-bleu WH2 repeat protein-like 1	SMD, editing	1.39	5.96905e-06	upregulated
689	ENST00000437099	ENSG00000007237	GAS7	chr17:9910608-10026285(-)	growth arrest-specific 7	SMD, editing	6.47	1.0665e-14	downregulated
690	ENST00000543538	ENSG00000163697	APBB2	chr4:40810027-40857155(-)	amyloid beta (A4) precursor protein-binding, family B, member 2	splicing	2.43	2.49422e-09	downregulated
691	TCONS_00095049	ENSG00000213853	EMP2	chr16:10499784-10580698(-)	epithelial membrane protein 2	splicing, editing	1.57	3.31492e-07	upregulated
692	ENST00000561387	ENSG00000246922	UBAP1L	chr15:65093008-65101628(-)	ubiquitin associated protein 1-like	editing	2.22	1.53385e-05	upregulated
693	ENST00000562817	ENSG00000261024	GS1-279B7.1	chr1:185321156-185333068(-)	microtubule-associated protein 1 light chain 3 beta pseudogene	splicing	2.18	1.24699e-07	downregulated
694	TCONS_00163348	ENSG00000159216	RUNX1	chr21:34785168-34886755(-)	runt-related transcription factor 1	editing	3.61	5.75118e-09	downregulated
695	TCONS_00247590	ENSG00000106714	CNTNAP3	chr9:39100548-39120861(-)	contactin associated protein-like 3	SMD	1.72	1.04635e-07	upregulated
696	TCONS_00231454	ENSG00000253882	RP11-61L23.2	chr7:143819375-143836933(-)		miRNA	2.26	5.61356e-13	upregulated
697	TCONS_00220242	ENSG00000136261	BZW2	chr7:16688524-16706523(+)	basic leucine zipper and W2 domains 2	splicing	1.61	9.0336e-21	upregulated
698	ENST00000262461	ENSG00000064651	SLC12A2	chr5:128083765-128189688(+)	solute carrier family 12 (sodium/potassium/chloride transporter), member 2	SMD	1.57	1.39776e-05	upregulated
699	TCONS_00206432	ENSG00000169247	SH3TC2	chr5:148826512-148972022(-)	SH3 domain and tetratricopeptide repeats 2	editing	2.17	6.55448e-11	upregulated
700	TCONS_00109427	ENSG00000176974	SHMT1	chr17:18315137-18363563(-)	serine hydroxymethyltransferase 1 (soluble)	SMD, editing	1.59	5.31841e-05	upregulated
701	ENST00000398055	ENSG00000174206	C12orf66	chr12:64191082-64222291(-)	chromosome 12 open reading frame 66	editing	1.44	2.36558e-07	upregulated
702	ENST00000592474	ENSG00000161542	PRPSAP1	chr17:76312792-76314690(-)	phosphoribosyl pyrophosphate synthetase-associated protein 1	editing	2.06	9.2863e-18	upregulated
703	TCONS_00216524	ENSG00000124749	COL21A1	chr6:56053916-56248187(-)	collagen, type XXI, alpha 1	SMD	4.51	2.49422e-09	upregulated
704	ENST00000376020	ENSG00000158352	SHROOM4	chrX:50591646-50814044(-)	shroom family member 4	SMD	4.23	3.5196e-11	downregulated
705	ENST00000257287	ENSG00000174799	CEP135	chr4:55948980-56033363(+)	centrosomal protein 135kDa	SMD, editing	1.93	2.04012e-12	downregulated
706	TCONS_00243280	ENSG00000260691	ANKRD20A1	chr9:67863501-67909824(+)	ankyrin repeat domain 20 family, member A1	SMD	2.4	3.64242e-07	upregulated
707	TCONS_00141681	ENSG00000136002	ARHGEF4	chr2:130837454-130963615(+)	Rho guanine nucleotide exchange factor (GEF) 4	SMD, editing	1.5	5.30226e-08	upregulated
708	ENST00000264914	ENSG00000113273	ARSB	chr5:78777208-78985785(-)	arylsulfatase B	SMD, editing	2.74	6.81816e-11	downregulated
709	TCONS_00204896	ENSG00000129595	EPB41L4A	chr5:112041319-112177783(-)	erythrocyte membrane protein band 4.1 like 4A	SMD, editing	1.4	0.000151821	upregulated
710	ENST00000511833	ENSG00000182903	ZNF721	chr4:441694-499156(-)	zinc finger protein 721	splicing	1.46	0.000541641	upregulated
711	ENST00000582754	ENSG00000108244	KRT23	chr17:40925160-40936835(-)	keratin 23 (histone deacetylase inducible)	splicing	4.01	1.8123e-06	downregulated
712	TCONS_00024563	ENSG00000185904	LINC00839	chr10:42475542-42495489(+)	long intergenic non-protein coding RNA 839	splicing	2.24	0.000183308	downregulated
713	TCONS_00186683	ENSG00000263327	TAPT1-AS1	chr4:16226630-16316978(+)	TAPT1 antisense RNA 1 (head to head)	SMD, editing	1.85	6.71018e-06	upregulated
714	TCONS_00196432	ENSG00000038382	TRIO	chr5:14143701-14511583(+)	trio Rho guanine nucleotide exchange factor	editing	2.44	1.7103e-15	downregulated
715	TCONS_00037380	ENSG00000172890	NADSYN1	chr11:71453108-71524107(+)	NAD synthetase 1	splicing	1.52	2.38687e-07	upregulated
716	TCONS_00101169	ENSG00000133030	MPRIP	chr17:17042544-17206064(+)	myosin phosphatase Rho interacting protein	splicing, editing	1.53	8.22695e-05	upregulated
717	ENST00000264033	ENSG00000110395	CBL	chr11:119206041-119308149(+)	Cbl proto-oncogene, E3 ubiquitin protein ligase	SMD, editing	1.73	7.3145e-08	upregulated
718	TCONS_00235219	ENSG00000104413	ESRP1	chr8:94637277-94707470(+)	epithelial splicing regulatory protein 1	SMD, editing	1.43	0.000117725	upregulated
719	TCONS_00188195	ENSG00000138758	SEPT11	chr4:76949702-77059227(+)	septin 11	editing	2.94	1.11864e-12	downregulated
720	ENST00000489959	ENSG00000241104	CEACAMP10	chr19:43211790-43248646(-)	carcinoembryonic antigen-related cell adhesion molecule pseudogene 10	splicing	2.41	0.000385481	downregulated
721	TCONS_00180671	ENSG00000163931	TKT	chr3:53196189-53255603(-)	transketolase	editing	1.62	0.000321536	upregulated
722	TCONS_00180672	ENSG00000163931	TKT	chr3:53196189-53255611(-)	transketolase	splicing, editing	1.62	0.000321536	upregulated
723	ENST00000393348	ENSG00000071051	NCK2	chr2:105745730-105881534(+)	NCK adaptor protein 2	splicing	1.4	4.51385e-05	upregulated
724	ENST00000606818	ENSG00000272211	RP11-347P5.1	chr2:196151262-196154881(+)		splicing	1.89	3.57149e-05	downregulated
725	TCONS_00020726	ENSG00000254154	RP4-798P15.3	chr1:177912410-178038007(-)		SMD, editing	2.06	6.20917e-06	upregulated
726	TCONS_00188196	ENSG00000138758	SEPT11	chr4:76949702-77059227(+)	septin 11	editing	2.94	1.11864e-12	downregulated
727	TCONS_00020723	ENSG00000254154	RP4-798P15.3	chr1:177912410-177973946(-)		SMD	2.06	6.20917e-06	upregulated
728	TCONS_00030165	ENSG00000232342	RP11-46O21.2	chr10:74439912-74512715(-)		splicing, SMD	1.41	4.50146e-05	upregulated
729	ENST00000336415	ENSG00000143702	CEP170	chr1:243125163-243200814(-)	centrosomal protein 170kDa	splicing	1.89	7.07426e-14	downregulated
730	TCONS_00004984	ENSG00000016602	CLCA4	chr1:86546812-86589693(+)	chloride channel accessory 4	splicing	3.32	1.8229e-09	upregulated
731	TCONS_00053528	ENSG00000151572	ANO4	chr12:101064120-101130929(+)	anoctamin 4	SMD	7.09	3.33032e-20	upregulated
732	TCONS_00083866	ENSG00000069974	RAB27A	chr15:55201606-55274773(-)	RAB27A, member RAS oncogene family	editing	2.48	8.48011e-08	downregulated
733	TCONS_00020728	ENSG00000254154	RP4-798P15.3	chr1:177912410-178038007(-)		SMD	2.06	6.20917e-06	upregulated
734	ENST00000217185	ENSG00000101213	PTK6	chr20:63528424-63537370(-)	protein tyrosine kinase 6	SMD, editing	1.53	0.000102848	upregulated
735	TCONS_00212185	ENSG00000279114	RP3-425C14.5	chr6:122471916-122515229(+)		SMD	1.57	0.00112417	upregulated
736	ENST00000366576	ENSG00000116984	MTR	chr1:236835615-236900418(+)	5-methyltetrahydrofolate-homocysteine methyltransferase	SMD, editing	1.46	2.65307e-05	upregulated
737	ENST00000366577	ENSG00000116984	MTR	chr1:236795309-236903981(+)	5-methyltetrahydrofolate-homocysteine methyltransferase	editing	1.46	2.65307e-05	upregulated
738	ENST00000413800	ENSG00000197093	GAL3ST4	chr7:100159243-100167284(-)	galactose-3-O-sulfotransferase 4	SMD, editing	2.07	1.81555e-06	downregulated
739	ENST00000354959	ENSG00000198521	ZNF43	chr19:21807325-21836208(-)	zinc finger protein 43	splicing	1.36	6.80853e-07	downregulated
740	TCONS_00235231	ENSG00000104413	ESRP1	chr8:94641611-94707470(+)	epithelial splicing regulatory protein 1	SMD, editing	1.43	0.000117725	upregulated
741	ENST00000405436	ENSG00000159128	IFNGR2	chr21:33403465-33437502(+)	interferon gamma receptor 2 (interferon gamma transducer 1)	splicing	1.57	0.00166993	downregulated
742	TCONS_00017972	ENSG00000223804	CH17-472G23.2	chr1:120264136-120342238(-)		SMD	1.77	0.00185731	downregulated
743	ENST00000374392	ENSG00000184454	NCMAP	chr1:24556110-24609325(+)	noncompact myelin associated protein	SMD, editing	2.69	0.00102867	upregulated
744	TCONS_00032153	ENSG00000237489	LINC00959	chr10:130096988-130110575(-)	long intergenic non-protein coding RNA 959	editing	1.66	1.18823e-07	upregulated
745	TCONS_00175015	ENSG00000196353	CPNE4	chr3:131597399-131717859(+)	copine IV	splicing, SMD	3.94	5.08294e-07	downregulated
746	TCONS_00057599	ENSG00000177359	RP11-551L14.1	chr12:31121025-31215362(-)		splicing	2.63	2.42045e-06	upregulated
747	TCONS_00107864	ENSG00000262304	TRPV1	chr17:3598860-3630587(-)	transient receptor potential cation channel, subfamily V, member 1	SMD, editing	1.53	9.31218e-09	upregulated
748	TCONS_00107867	ENSG00000262304	TRPV1	chr17:3614882-3630955(-)	transient receptor potential cation channel, subfamily V, member 1	SMD, editing	1.53	9.31218e-09	upregulated
749	ENST00000589285	ENSG00000171817	ZNF540	chr19:37610987-37614093(+)	zinc finger protein 540	editing	1.6	6.56258e-06	upregulated
750	TCONS_00116334	ENSG00000168675	LDLRAD4	chr18:13268669-13328815(+)	low density lipoprotein receptor class A domain containing 4	editing, miRNA	5.54	8.30378e-29	downregulated
751	ENST00000547860	ENSG00000111145	ELK3	chr12:96194613-96247211(+)	ELK3, ETS-domain protein (SRF accessory protein 2)	splicing	1.61	2.9765e-05	downregulated
752	ENST00000547865	ENSG00000123352	SPATS2	chr12:49367546-49463625(+)	spermatogenesis associated, serine-rich 2	SMD, editing	1.75	1.12475e-05	downregulated
753	TCONS_00221037	ENSG00000106536	POU6F2	chr7:38976158-39155219(+)	POU class 6 homeobox 2	editing	4.19	3.71824e-07	upregulated
754	ENST00000473091	ENSG00000134882	UBAC2	chr13:99200891-99314220(+)	UBA domain containing 2	splicing	1.44	2.95658e-09	upregulated
755	ENST00000421802	ENSG00000159128	IFNGR2	chr21:33432318-33479348(+)	interferon gamma receptor 2 (interferon gamma transducer 1)	splicing	1.57	0.00166993	downregulated
756	TCONS_00175016	ENSG00000196353	CPNE4	chr3:131597399-131717859(+)	copine IV	splicing	3.94	5.08294e-07	downregulated
757	TCONS_00075917	ENSG00000100784	RPS6KA5	chr14:90905278-90927490(-)	ribosomal protein S6 kinase, 90kDa, polypeptide 5	editing	1.84	0.000481951	upregulated
758	TCONS_00203197	ENSG00000083720	OXCT1	chr5:41722730-41870543(-)	3-oxoacid CoA transferase 1	editing	1.52	8.86842e-10	upregulated
759	TCONS_00050077	ENSG00000235884	LINC00941	chr12:30794487-30819053(+)	long intergenic non-protein coding RNA 941	editing	1.64	0.000637744	upregulated
760	TCONS_00108999	ENSG00000175106	TVP23C	chr17:15426057-15563611(-)	trans-golgi network vesicle protein 23 homolog C (S. cerevisiae)	editing	1.42	0.000127496	upregulated
761	TCONS_00235906	ENSG00000178764	ZHX2	chr8:122868712-122978178(+)	zinc fingers and homeoboxes 2	SMD	1.57	0.000329928	upregulated
762	TCONS_00026086	ENSG00000198682	PAPSS2	chr10:87659612-87756927(+)	3'-phosphoadenosine 5'-phosphosulfate synthase 2	SMD	1.5	1.19133e-09	downregulated
763	TCONS_00148048	ENSG00000171126	KCNG3	chr2:42393558-42494097(-)	potassium voltage-gated channel, subfamily G, member 3	SMD, editing	2.16	4.79373e-05	upregulated
764	TCONS_00069481	ENSG00000139946	PELI2	chr14:56118374-56326039(+)	pellino E3 ubiquitin protein ligase family member 2	editing	2.13	1.07891e-05	upregulated
765	TCONS_00226462	ENSG00000272894	RP5-1159O4.1	chr7:7548155-7566996(-)		splicing	1.74	2.19636e-05	upregulated
766	TCONS_00070307	ENSG00000100731	PCNX	chr14:70907404-71119432(+)	pecanex homolog (Drosophila)	editing	1.38	1.42733e-06	downregulated
767	TCONS_00203198	ENSG00000083720	OXCT1	chr5:41722730-41870582(-)	3-oxoacid CoA transferase 1	editing	1.52	8.86842e-10	upregulated
768	TCONS_00246554	ENSG00000099219	ERMP1	chr9:5747278-6008035(-)	endoplasmic reticulum metallopeptidase 1	SMD, editing	1.38	2.80767e-10	upregulated
769	TCONS_00222623	ENSG00000005469	CROT	chr7:87345680-87410473(+)	carnitine O-octanoyltransferase	SMD	1.61	6.53931e-06	downregulated
770	TCONS_00023689	ENSG00000165630	PRPF18	chr10:13586926-13701484(+)	pre-mRNA processing factor 18	editing, miRNA	1.53	2.97956e-05	upregulated
771	TCONS_00053074	ENSG00000133641	C12orf29	chr12:88035445-88060029(+)	chromosome 12 open reading frame 29	SMD	1.52	3.43398e-09	upregulated
772	TCONS_00023685	ENSG00000165630	PRPF18	chr10:13586926-13701484(+)	pre-mRNA processing factor 18	editing, miRNA	1.53	2.97956e-05	upregulated
773	TCONS_00023687	ENSG00000165630	PRPF18	chr10:13586926-13701484(+)	pre-mRNA processing factor 18	editing, miRNA	1.53	2.97956e-05	upregulated
774	TCONS_00065864	ENSG00000234772	LINC00412	chr13:27193683-27251288(-)	long intergenic non-protein coding RNA 412	editing	1.57	0.000771689	upregulated
775	TCONS_00009095	ENSG00000143324	XPR1	chr1:180632003-180897341(+)	xenotropic and polytropic retrovirus receptor 1	editing, miRNA	1.81	4.338e-07	downregulated
776	TCONS_00023682	ENSG00000165630	PRPF18	chr10:13586926-13701484(+)	pre-mRNA processing factor 18	editing, miRNA	1.53	2.97956e-05	upregulated
777	ENST00000536180	ENSG00000062716	VMP1	chr17:59707667-59841092(+)	vacuole membrane protein 1	splicing	3.46	1.19343e-12	downregulated
778	ENST00000448612	ENSG00000184465	WDR27	chr6:169457211-169701653(-)	WD repeat domain 27	splicing	1.47	1.83671e-07	upregulated
779	TCONS_00198052	ENSG00000164346	NSA2	chr5:74766924-74867854(+)	NSA2 ribosome biogenesis homolog (S. cerevisiae)	SMD	2.01	4.9463e-09	upregulated
780	TCONS_00141404	ENSG00000074047	GLI2	chr2:120736155-120857346(+)	GLI family zinc finger 2	editing	2.91	1.38357e-07	downregulated
781	TCONS_00186689	ENSG00000263327	TAPT1-AS1	chr4:16226684-16337791(+)	TAPT1 antisense RNA 1 (head to head)	editing	1.85	6.71018e-06	upregulated
782	TCONS_00143298	ENSG00000163002	NUP35	chr2:183124354-183414838(+)	nucleoporin 35kDa	SMD	1.74	3.81116e-05	upregulated
783	ENST00000381995	ENSG00000159128	IFNGR2	chr21:33403431-33437521(+)	interferon gamma receptor 2 (interferon gamma transducer 1)	splicing	1.57	0.00166993	downregulated
784	TCONS_00065093	ENSG00000134882	UBAC2	chr13:99200773-99365484(+)	UBA domain containing 2	editing	1.44	2.95658e-09	upregulated
785	TCONS_00143295	ENSG00000163002	NUP35	chr2:183124334-183276709(+)	nucleoporin 35kDa	editing, miRNA	1.74	3.81116e-05	upregulated
786	TCONS_00143293	ENSG00000163002	NUP35	chr2:183124296-183414838(+)	nucleoporin 35kDa	SMD, miRNA	1.74	3.81116e-05	upregulated
787	TCONS_00065097	ENSG00000134882	UBAC2	chr13:99200773-99393449(+)	UBA domain containing 2	SMD, editing	1.44	2.95658e-09	upregulated
788	TCONS_00065094	ENSG00000134882	UBAC2	chr13:99200773-99365484(+)	UBA domain containing 2	editing	1.44	2.95658e-09	upregulated
789	TCONS_00157915	ENSG00000179242	CDH4	chr20:61252425-61262865(+)	cadherin 4, type 1, R-cadherin (retinal)	SMD	3.85	1.14378e-06	upregulated
790	TCONS_00163092	ENSG00000156299	TIAM1	chr21:31210667-31344301(-)	T-cell lymphoma invasion and metastasis 1	SMD	1.45	0.000101892	upregulated
791	TCONS_00163091	ENSG00000156299	TIAM1	chr21:31147804-31344316(-)	T-cell lymphoma invasion and metastasis 1	SMD	1.45	0.000101892	upregulated
792	TCONS_00219453	ENSG00000184465	WDR27	chr6:169436817-169723620(-)	WD repeat domain 27	editing, SMD	1.47	1.83671e-07	upregulated
793	TCONS_00102928	ENSG00000274211	SOCS7	chr17:38352019-38406154(+)	suppressor of cytokine signaling 7	SMD	1.63	0.000166224	upregulated
794	TCONS_00163095	ENSG00000156299	TIAM1	chr21:31222717-31344279(-)	T-cell lymphoma invasion and metastasis 1	SMD, editing	1.45	0.000101892	upregulated
795	ENST00000303372	ENSG00000168778	TCTN2	chr12:123671112-123708403(+)	tectonic family member 2	SMD, editing, miRNA	1.8	1.66051e-05	downregulated
796	TCONS_00138864	ENSG00000276843	Metazoa_SRP	chr2:63098641-63466361(+)	Metazoan signal recognition particle RNA	splicing, SMD	1.63	4.2952e-06	upregulated
797	ENST00000395684	ENSG00000176974	SHMT1	chr17:18327872-18341655(-)	serine hydroxymethyltransferase 1 (soluble)	editing	1.59	5.31841e-05	upregulated
798	TCONS_00135644	ENSG00000197608	ZNF841	chr19:52040513-52095778(-)	zinc finger protein 841	SMD, editing	1.54	2.58945e-14	downregulated
799	TCONS_00030584	ENSG00000107864	CPEB3	chr10:92080223-92240737(-)	cytoplasmic polyadenylation element binding protein 3	editing	1.7	0.000161606	upregulated
800	TCONS_00148387	ENSG00000115310	RTN4	chr2:54972186-55050828(-)	reticulon 4	SMD, editing	1.57	5.54427e-09	downregulated
801	TCONS_00148389	ENSG00000115310	RTN4	chr2:54972186-55052394(-)	reticulon 4	SMD, editing	1.57	5.54427e-09	downregulated
802	ENST00000567445	ENSG00000140945	CDH13	chr16:82627038-82859718(+)	cadherin 13	SMD, editing	1.82	0.00434526	downregulated
803	TCONS_00030588	ENSG00000107864	CPEB3	chr10:92098201-92243279(-)	cytoplasmic polyadenylation element binding protein 3	editing, miRNA	1.7	0.000161606	upregulated
804	ENST00000377411	ENSG00000180758	GPR157	chr1:9100304-9129170(-)	G protein-coupled receptor 157	editing	1.78	4.22876e-06	upregulated
805	TCONS_00075827	ENSG00000053254	FOXN3	chr14:89171011-89325216(-)	forkhead box N3	editing, miRNA	1.85	6.278e-09	upregulated
806	ENST00000360304	ENSG00000065534	MYLK	chr3:123612297-123876618(-)	myosin light chain kinase	splicing	1.73	1.57378e-07	downregulated
807	TCONS_00114623	ENSG00000129646	QRICH2	chr17:76273809-76355456(-)	glutamine rich 2	editing	2.45	3.6342e-11	upregulated
808	ENST00000373857	ENSG00000169403	PTAFR	chr1:28147165-28177188(-)	platelet-activating factor receptor	editing	1.63	3.70011e-06	upregulated
809	TCONS_00203122	ENSG00000153071	DAB2	chr5:39360130-39425799(-)	Dab, mitogen-responsive phosphoprotein, homolog 2 (Drosophila)	SMD	3.16	2.56618e-12	downregulated
810	TCONS_00216910	ENSG00000118418	HMGN3	chr6:79187536-79234738(-)	high mobility group nucleosomal binding domain 3	editing	1.49	9.33241e-05	upregulated
811	TCONS_00133831	ENSG00000079385	CEACAM1	chr19:42513450-42531940(-)	carcinoembryonic antigen-related cell adhesion molecule 1 (biliary glycoprotein)	editing	2.14	1.93741e-08	downregulated
812	TCONS_00008385	ENSG00000198929	NOS1AP	chr1:162069773-162259521(+)	nitric oxide synthase 1 (neuronal) adaptor protein	SMD, editing	1.73	0.00190121	upregulated
813	ENST00000434560	ENSG00000228972	RP1-86D1.2	chr6:128430940-128432768(-)		editing	1.7	3.43494e-05	downregulated
814	TCONS_00226463	ENSG00000272894	RP5-1159O4.1	chr7:7548155-7567001(-)		splicing	1.74	2.19636e-05	upregulated
815	ENST00000610021	ENSG00000273081	RP4-813F11.4	chr7:141002609-141004849(-)		editing	1.97	1.08016e-05	upregulated
816	ENST00000427746	ENSG00000159267	HLCS	chr21:36937213-36990224(-)	holocarboxylase synthetase (biotin-(proprionyl-CoA-carboxylase (ATP-hydrolysing)) ligase)	splicing	1.43	9.31908e-05	upregulated
817	TCONS_00119477	ENSG00000184828	ZBTB7C	chr18:48021276-48103060(-)	zinc finger and BTB domain containing 7C	editing	1.47	0.000292253	upregulated
818	TCONS_00168219	ENSG00000100296	THOC5	chr22:29498810-29571911(-)	THO complex 5	SMD, editing, miRNA	1.49	2.21623e-07	upregulated
819	ENST00000395811	ENSG00000133030	MPRIP	chr17:17042759-17192648(+)	myosin phosphatase Rho interacting protein	SMD	1.53	8.22695e-05	upregulated
820	ENST00000075120	ENSG00000059804	SLC2A3	chr12:7919229-7936275(-)	solute carrier family 2 (facilitated glucose transporter), member 3	SMD, miRNA	3.79	2.05631e-08	downregulated
821	TCONS_00119478	ENSG00000184828	ZBTB7C	chr18:48021276-48161711(-)	zinc finger and BTB domain containing 7C	editing	1.47	0.000292253	upregulated
822	TCONS_00192331	ENSG00000135605	TEC	chr4:48120392-48269864(-)	tec protein tyrosine kinase	SMD, editing	1.97	0.000158184	upregulated
823	ENST00000530055	ENSG00000172890	NADSYN1	chr11:71479293-71501539(+)	NAD synthetase 1	splicing	1.52	2.38687e-07	upregulated
824	TCONS_00011358	ENSG00000116984	MTR	chr1:236795266-236933657(+)	5-methyltetrahydrofolate-homocysteine methyltransferase	editing	1.46	2.65307e-05	upregulated
825	TCONS_00011359	ENSG00000116984	MTR	chr1:236795270-236933657(+)	5-methyltetrahydrofolate-homocysteine methyltransferase	editing	1.46	2.65307e-05	upregulated
826	TCONS_00163093	ENSG00000156299	TIAM1	chr21:31210667-31344743(-)	T-cell lymphoma invasion and metastasis 1	SMD	1.45	0.000101892	upregulated
827	TCONS_00107851	ENSG00000262304	TRPV1	chr17:3565370-3637330(-)	transient receptor potential cation channel, subfamily V, member 1	SMD, editing, miRNA	1.53	9.31218e-09	upregulated
828	TCONS_00011355	ENSG00000116984	MTR	chr1:236795190-236933657(+)	5-methyltetrahydrofolate-homocysteine methyltransferase	editing	1.46	2.65307e-05	upregulated
829	TCONS_00249285	ENSG00000228623	ZNF883	chr9:112994795-113012227(-)	zinc finger protein 883	SMD	1.67	0.000324708	upregulated
830	TCONS_00200504	ENSG00000145819	ARHGAP26	chr5:142772716-143049288(+)	Rho GTPase activating protein 26	SMD, editing	3.39	1.40722e-17	downregulated
831	ENST00000357491	ENSG00000198521	ZNF43	chr19:21804948-21852068(-)	zinc finger protein 43	splicing, editing	1.36	6.80853e-07	downregulated
832	TCONS_00155493	ENSG00000125834	STK35	chr20:2101610-2161328(+)	serine/threonine kinase 35	SMD, editing	2.43	1.6344e-06	upregulated
833	TCONS_00155490	ENSG00000125834	STK35	chr20:2097688-2161328(+)	serine/threonine kinase 35	SMD, editing	2.43	1.6344e-06	upregulated
834	TCONS_00118345	ENSG00000154655	L3MBTL4	chr18:5946070-6003055(-)	l(3)mbt-like 4 (Drosophila)	SMD	2.2	1.22572e-11	upregulated
835	ENST00000515418	ENSG00000196353	CPNE4	chr3:131534736-131723631(-)	copine IV	splicing	3.94	5.08294e-07	downregulated
836	ENST00000264893	ENSG00000138758	SEPT11	chr4:76949702-77038614(+)	septin 11	SMD, editing	2.94	1.11864e-12	downregulated
837	ENST00000370435	ENSG00000119900	OGFRL1	chr6:71288802-71308950(+)	opioid growth factor receptor-like 1	SMD, miRNA	1.63	0.000143997	upregulated
838	ENST00000514964	ENSG00000109452	INPP4B	chr4:142654511-142766819(-)	inositol polyphosphate-4-phosphatase, type II, 105kDa	splicing	1.68	0.000118952	downregulated
839	TCONS_00033419	ENSG00000133805	AMPD3	chr11:10455508-10535248(+)	adenosine monophosphate deaminase 3	SMD	1.59	0.000124005	upregulated
840	ENST00000424496	ENSG00000225528	RP3-370M22.8	chr22:39960396-39964683(+)		splicing	2.32	7.83498e-05	upregulated
841	TCONS_00152103	ENSG00000082438	COBLL1	chr2:164636985-164801356(-)	cordon-bleu WH2 repeat protein-like 1	editing, SMD	1.39	5.96905e-06	upregulated
842	TCONS_00237415	ENSG00000156011	PSD3	chr8:18752721-19259469(-)	pleckstrin and Sec7 domain containing 3	editing	1.71	1.0224e-08	downregulated
843	TCONS_00148704	ENSG00000143951	WDPCP	chr2:63201179-63604874(-)	WD repeat containing planar cell polarity effector	SMD, splicing, editing, miRNA	1.49	2.61501e-06	upregulated
844	TCONS_00148705	ENSG00000143951	WDPCP	chr2:63201179-63604875(-)	WD repeat containing planar cell polarity effector	SMD, editing, miRNA	1.49	2.61501e-06	upregulated
845	TCONS_00059493	ENSG00000170581	STAT2	chr12:56341585-56360173(-)	signal transducer and activator of transcription 2, 113kDa	SMD, editing, miRNA	2.02	5.97107e-10	downregulated
846	TCONS_00147100	ENSG00000119778	ATAD2B	chr2:23714475-23927171(-)	ATPase family, AAA domain containing 2B	SMD, editing	1.47	3.67862e-05	upregulated
847	TCONS_00059495	ENSG00000170581	STAT2	chr12:56341585-56360193(-)	signal transducer and activator of transcription 2, 113kDa	SMD, editing, miRNA	2.02	5.97107e-10	downregulated
848	ENST00000612898	ENSG00000233822	HIST1H2BN	chr6:27837759-27839482(+)	histone cluster 1, H2bn	SMD	2.26	2.25773e-13	downregulated
849	TCONS_00059497	ENSG00000170581	STAT2	chr12:56341585-56360193(-)	signal transducer and activator of transcription 2, 113kDa	SMD, editing, miRNA	2.02	5.97107e-10	downregulated
850	TCONS_00151860	ENSG00000115170	ACVR1	chr2:157716866-157819029(-)	activin A receptor, type I	SMD	1.42	0.000202731	downregulated
851	TCONS_00125901	ENSG00000167380	ZNF226	chr19:44165072-44200986(+)	zinc finger protein 226	SMD, editing	1.43	2.04588e-05	upregulated
852	ENST00000475012	ENSG00000144724	PTPRG	chr3:62217582-62293551(+)	protein tyrosine phosphatase, receptor type, G	splicing	4.06	1.59134e-13	downregulated
853	TCONS_00125904	ENSG00000167380	ZNF226	chr19:44165072-44200986(+)	zinc finger protein 226	SMD, editing	1.43	2.04588e-05	upregulated
854	TCONS_00020768	ENSG00000254154	RP4-798P15.3	chr1:177978751-178038007(-)		editing	2.06	6.20917e-06	upregulated
855	TCONS_00013935	ENSG00000169403	PTAFR	chr1:28141593-28193936(-)	platelet-activating factor receptor	editing	1.63	3.70011e-06	upregulated
856	TCONS_00034643	ENSG00000085117	CD82	chr11:44565590-44636006(+)	CD82 molecule	SMD, editing	1.52	0.000108682	upregulated
857	TCONS_00034642	ENSG00000085117	CD82	chr11:44565590-44636006(+)	CD82 molecule	SMD, editing	1.52	0.000108682	upregulated
858	ENST00000582217	ENSG00000176658	MYO1D	chr17:32653863-32684284(-)	myosin ID	splicing	2.06	6.58492e-09	downregulated
859	ENST00000345127	ENSG00000139174	PRICKLE1	chr12:42456753-42589676(-)	prickle homolog 1 (Drosophila)	SMD	5.07	3.99551e-18	downregulated
860	TCONS_00250024	ENSG00000148341	SH3GLB2	chr9:128982542-129028303(-)	SH3-domain GRB2-like endophilin B2	editing	1.48	9.90469e-05	upregulated
861	TCONS_00141667	ENSG00000136002	ARHGEF4	chr2:130836905-130963615(+)	Rho guanine nucleotide exchange factor (GEF) 4	SMD, editing	1.5	5.30226e-08	upregulated
862	ENST00000423516	ENSG00000163931	TKT	chr3:53225656-53256022(-)	transketolase	splicing	1.62	0.000321536	upregulated
863	TCONS_00147113	ENSG00000119778	ATAD2B	chr2:23775419-23843099(-)	ATPase family, AAA domain containing 2B	editing	1.47	3.67862e-05	upregulated
864	TCONS_00147115	ENSG00000119778	ATAD2B	chr2:23775419-23927153(-)	ATPase family, AAA domain containing 2B	editing	1.47	3.67862e-05	upregulated
865	TCONS_00095050	ENSG00000213853	EMP2	chr16:10499784-10580737(-)	epithelial membrane protein 2	editing	1.57	3.31492e-07	upregulated
866	ENST00000323699	ENSG00000143753	DEGS1	chr1:224183170-224193441(+)	delta(4)-desaturase, sphingolipid 1	editing, miRNA	2.18	5.39429e-08	downregulated
867	TCONS_00203989	ENSG00000198780	FAM169A	chr5:74832663-74865916(-)	family with sequence similarity 169, member A	editing	2.39	2.00921e-06	upregulated
868	ENST00000481987	ENSG00000143702	CEP170	chr1:243124892-243156821(-)	centrosomal protein 170kDa	splicing	1.89	7.07426e-14	downregulated
869	TCONS_00025758	ENSG00000108175	ZMIZ1	chr10:79070245-79242840(+)	zinc finger, MIZ-type containing 1	SMD, editing	2.38	2.59596e-08	upregulated
870	ENST00000379565	ENSG00000177189	RPS6KA3	chrX:20149910-20266840(-)	ribosomal protein S6 kinase, 90kDa, polypeptide 3	SMD	1.58	7.58283e-05	upregulated
871	TCONS_00076764	ENSG00000088808	PPP1R13B	chr14:103755905-103848840(-)	protein phosphatase 1, regulatory subunit 13B	SMD, editing	1.65	5.29118e-06	upregulated
872	ENST00000524264	ENSG00000245275	SAP30L-AS1	chr5:154392170-154445813(-)	SAP30L antisense RNA 1 (head to head)	splicing	1.59	0.000131333	upregulated
873	TCONS_00095052	ENSG00000213853	EMP2	chr16:10519818-10580698(-)	epithelial membrane protein 2	editing	1.57	3.31492e-07	upregulated
874	TCONS_00089065	ENSG00000103319	EEF2K	chr16:22206281-22289192(+)	eukaryotic elongation factor-2 kinase	SMD, editing, miRNA	1.51	7.37041e-06	upregulated
875	ENST00000301178	ENSG00000167601	AXL	chr19:41219202-41261766(+)	AXL receptor tyrosine kinase	SMD, editing	2.07	5.78182e-07	downregulated
876	TCONS_00089066	ENSG00000103319	EEF2K	chr16:22206281-22289192(+)	eukaryotic elongation factor-2 kinase	SMD, editing, miRNA	1.51	7.37041e-06	upregulated
877	ENST00000327473	ENSG00000185361	TNFAIP8L1	chr19:4639517-4655568(+)	tumor necrosis factor, alpha-induced protein 8-like 1	editing, miRNA	1.65	1.18075e-09	downregulated
878	ENST00000494102	ENSG00000173611	SCAI	chr9:124971257-124976186(-)	suppressor of cancer cell invasion	splicing	1.54	0.000304323	upregulated
879	TCONS_00023298	ENSG00000185736	ADARB2	chr10:1699839-1737635(+)	adenosine deaminase, RNA-specific, B2 (non-functional)	SMD	4.67	2.38687e-07	upregulated
880	ENST00000312828	ENSG00000176641	RNF152	chr18:61808062-61893759(-)	ring finger protein 152	SMD, editing	1.89	2.01319e-07	downregulated
881	ENST00000429747	ENSG00000196353	CPNE4	chr3:131533561-132035442(-)	copine IV	splicing	3.94	5.08294e-07	downregulated
882	TCONS_00026285	ENSG00000095596	CYP26A1	chr10:93073474-93081624(+)	cytochrome P450, family 26, subfamily A, polypeptide 1	SMD	2.66	0.00109639	upregulated
883	TCONS_00023292	ENSG00000185736	ADARB2	chr10:1675345-1737635(+)	adenosine deaminase, RNA-specific, B2 (non-functional)	SMD	4.67	2.38687e-07	upregulated
884	TCONS_00023291	ENSG00000185736	ADARB2	chr10:1672669-1737635(+)	adenosine deaminase, RNA-specific, B2 (non-functional)	SMD	4.67	2.38687e-07	upregulated
885	TCONS_00023296	ENSG00000185736	ADARB2	chr10:1675512-1737635(+)	adenosine deaminase, RNA-specific, B2 (non-functional)	SMD	4.67	2.38687e-07	upregulated
886	TCONS_00065858	ENSG00000152484	USP12	chr13:27063993-27171896(-)	ubiquitin specific peptidase 12	SMD	1.52	0.00101323	upregulated
887	TCONS_00065859	ENSG00000152484	USP12	chr13:27063993-27171896(-)	ubiquitin specific peptidase 12	editing	1.52	0.00101323	upregulated
888	TCONS_00010354	ENSG00000082512	TRAF5	chr1:211326614-211376403(+)	TNF receptor-associated factor 5	editing, miRNA	2.3	2.4656e-08	downregulated
889	ENST00000310045	ENSG00000171451	DSEL	chr18:67506581-67516980(-)	dermatan sulfate epimerase-like	SMD, editing	3.51	2.93485e-15	downregulated
890	TCONS_00132247	ENSG00000198521	ZNF43	chr19:21844947-21852125(-)	zinc finger protein 43	editing	1.36	6.80853e-07	downregulated
891	TCONS_00144404	ENSG00000221388	AC093865.1	chr2:212634458-212763622(+)		SMD	1.69	2.55633e-06	upregulated
892	ENST00000494969	ENSG00000198223	CSF2RA	chrX:1268831-1309922(+)	colony stimulating factor 2 receptor, alpha, low-affinity (granulocyte-macrophage)	splicing	4.21	1.08735e-10	downregulated
893	ENST00000332592	ENSG00000150401	DCUN1D2	chr13:113455818-113490691(-)	DCN1, defective in cullin neddylation 1, domain containing 2	SMD	1.47	3.99101e-09	upregulated
894	ENST00000553936	ENSG00000171723	GPHN	chr14:66508515-66916034(+)	gephyrin	splicing	1.73	1.34281e-14	upregulated
895	TCONS_00056597	ENSG00000172243	CLEC7A	chr12:10087553-10130258(-)	C-type lectin domain family 7, member A	editing	1.6	0.000174064	upregulated
896	ENST00000437745	ENSG00000136261	BZW2	chr7:16646159-16706523(+)	basic leucine zipper and W2 domains 2	splicing	1.61	9.0336e-21	upregulated
897	ENST00000407780	ENSG00000160223	ICOSLG	chr21:44222990-44240945(-)	inducible T-cell co-stimulator ligand	SMD, editing	2.23	5.95177e-05	upregulated
898	TCONS_00104960	ENSG00000121057	AKAP1	chr17:57085713-57130108(+)	A kinase (PRKA) anchor protein 1	SMD	1.47	1.99594e-12	upregulated
899	ENST00000306390	ENSG00000171236	LRG1	chr19:4536408-4540474(-)	leucine-rich alpha-2-glycoprotein 1	SMD	4.21	1.97006e-07	downregulated
900	ENST00000513147	ENSG00000245958	RP11-33B1.1	chr4:119460436-119461910(+)		splicing	1.54	0.000357639	upregulated
901	TCONS_00053501	ENSG00000151572	ANO4	chr12:100717422-101130929(+)	anoctamin 4	SMD	7.09	3.33032e-20	upregulated
902	TCONS_00053503	ENSG00000151572	ANO4	chr12:100717448-101056313(+)	anoctamin 4	editing	7.09	3.33032e-20	upregulated
903	TCONS_00053502	ENSG00000151572	ANO4	chr12:100717429-101130929(+)	anoctamin 4	SMD	7.09	3.33032e-20	upregulated
904	ENST00000534281	ENSG00000110315	RNF141	chr11:10511922-10517740(-)	ring finger protein 141	editing	1.55	8.26216e-07	upregulated
905	TCONS_00010841	ENSG00000143819	EPHX1	chr1:225805290-225872062(+)	epoxide hydrolase 1, microsomal (xenobiotic)	SMD	1.65	5.00999e-06	upregulated
906	TCONS_00212345	ENSG00000224733	RP1-86D1.5	chr6:128488942-128505218(+)		splicing	1.73	6.42242e-05	downregulated
907	TCONS_00078200	ENSG00000137880	GCHFR	chr15:40764019-40776306(+)	GTP cyclohydrolase I feedback regulator	SMD	1.51	4.69219e-10	upregulated
908	TCONS_00001821	ENSG00000157978	LDLRAP1	chr1:25543899-25583351(+)	low density lipoprotein receptor adaptor protein 1	editing	1.94	3.1401e-06	upregulated
909	TCONS_00163367	ENSG00000159216	RUNX1	chr21:34849487-34888858(-)	runt-related transcription factor 1	SMD, editing	3.61	5.75118e-09	downregulated
910	TCONS_00001823	ENSG00000157978	LDLRAP1	chr1:25543978-25583351(+)	low density lipoprotein receptor adaptor protein 1	editing	1.94	3.1401e-06	upregulated
911	TCONS_00247576	ENSG00000106714	CNTNAP3	chr9:39062118-39288332(-)	contactin associated protein-like 3	editing	1.72	1.04635e-07	upregulated
912	ENST00000517408	ENSG00000253925	CTB-178M22.1	chr5:168085328-168187719(-)		splicing	3.23	9.75875e-07	downregulated
913	TCONS_00032161	ENSG00000176769	TCERG1L	chr10:131091017-131311721(-)	transcription elongation regulator 1-like	SMD	1.7	0.00478811	upregulated
914	ENST00000342147	ENSG00000213853	EMP2	chr16:10544179-10580632(-)	epithelial membrane protein 2	editing	1.57	3.31492e-07	upregulated
915	ENST00000368489	ENSG00000143515	ATP8B2	chr1:154327799-154351307(+)	ATPase, aminophospholipid transporter, class I, type 8B, member 2	SMD, editing	3.88	5.7584e-40	downregulated
916	ENST00000549365	ENSG00000136048	DRAM1	chr12:101877796-101908327(+)	DNA-damage regulated autophagy modulator 1	splicing	3.29	8.93529e-15	downregulated
917	TCONS_00094124	ENSG00000162040	HS3ST6	chr16:1898142-1918440(-)	heparan sulfate (glucosamine) 3-O-sulfotransferase 6	SMD	4.37	1.15914e-09	upregulated
918	TCONS_00116669	ENSG00000134757	DSG3	chr18:31447574-31480436(+)	desmoglein 3	SMD	3.72	2.28772e-06	downregulated
919	ENST00000587344	ENSG00000267702	RP11-53B2.2	chr18:13486461-13490676(+)		editing	5.78	2.07966e-30	downregulated
920	TCONS_00010077	ENSG00000266094	RASSF5	chr1:206524716-206611381(+)	Ras association (RalGDS/AF-6) domain family member 5	SMD	1.71	6.46356e-06	upregulated
921	TCONS_00088441	ENSG00000261216	RP11-166B2.5	chr16:11886465-11915176(+)		splicing, editing	1.63	1.66051e-05	upregulated
922	ENST00000591226	ENSG00000167460	TPM4	chr19:16099666-16102338(+)	tropomyosin 4	editing	2.15	6.20221e-06	downregulated
923	TCONS_00174643	ENSG00000241278	ENPP7P4	chr3:125765707-125915814(+)	ectonucleotide pyrophosphatase/phosphodiesterase 7 pseudogene 4	SMD	1.82	0.000437877	upregulated
924	TCONS_00184486	ENSG00000114450	GNB4	chr3:179389994-179451623(-)	guanine nucleotide binding protein (G protein), beta polypeptide 4	editing, miRNA	2.57	2.29681e-27	downregulated
925	TCONS_00235685	ENSG00000164830	OXR1	chr8:106270143-106762632(+)	oxidation resistance 1	editing, SMD	1.61	6.8e-05	upregulated
926	ENST00000436868	ENSG00000136261	BZW2	chr7:16646173-16706509(+)	basic leucine zipper and W2 domains 2	splicing	1.61	9.0336e-21	upregulated
927	ENST00000338758	ENSG00000188677	PARVB	chr22:44024276-44172949(+)	parvin, beta	editing	3	2.42274e-15	downregulated
928	TCONS_00097030	ENSG00000261092	RP11-21B23.2	chr16:50387718-50396895(-)		splicing	1.58	6.9148e-05	upregulated
929	TCONS_00050741	ENSG00000123352	SPATS2	chr12:49366855-49529272(+)	spermatogenesis associated, serine-rich 2	SMD, editing	1.75	1.12475e-05	downregulated
930	TCONS_00054795	ENSG00000110987	BCL7A	chr12:122021894-122065822(+)	B-cell CLL/lymphoma 7A	editing	1.65	3.97614e-10	upregulated
931	ENST00000233154	ENSG00000071051	NCK2	chr2:105744896-105894274(+)	NCK adaptor protein 2	splicing	1.4	4.51385e-05	upregulated
932	TCONS_00229218	ENSG00000240720	LRRD1	chr7:92082515-92134547(-)	leucine-rich repeats and death domain containing 1	editing	1.54	4.14363e-08	upregulated
933	TCONS_00229219	ENSG00000240720	LRRD1	chr7:92082515-92136937(-)	leucine-rich repeats and death domain containing 1	editing	1.54	4.14363e-08	upregulated
934	ENST00000361228	ENSG00000198774	RASSF9	chr12:85800696-85836570(-)	Ras association (RalGDS/AF-6) domain family (N-terminal) member 9	SMD	2.73	4.37913e-14	downregulated
935	TCONS_00184525	ENSG00000241696	RP11-420J11.2	chr3:180293185-180493701(-)		SMD	1.99	0.0010529	upregulated
936	TCONS_00148698	ENSG00000143951	WDPCP	chr2:63201179-63289256(-)	WD repeat containing planar cell polarity effector	splicing, editing	1.49	2.61501e-06	upregulated
937	ENST00000496322	ENSG00000016602	CLCA4	chr1:86571115-86572956(+)	chloride channel accessory 4	splicing	3.32	1.8229e-09	upregulated
938	TCONS_00009834	ENSG00000143842	SOX13	chr1:204073079-204120934(+)	SRY (sex determining region Y)-box 13	editing	1.75	0.000431534	upregulated
939	TCONS_00240649	ENSG00000170873	MTSS1	chr8:124485790-124728480(-)	metastasis suppressor 1	SMD	1.52	2.44459e-05	upregulated
940	TCONS_00050209	ENSG00000139132	FGD4	chr12:32530994-32649676(+)	FYVE, RhoGEF and PH domain containing 4	editing	1.44	1.11996e-08	upregulated
941	ENST00000428597	ENSG00000240498	CDKN2B-AS1	chr9:21994790-22121095(+)	CDKN2B antisense RNA 1	splicing	2.2	1.67745e-06	downregulated
942	TCONS_00213775	ENSG00000214113	LYRM4	chr6:5148146-5260950(-)	LYR motif containing 4	splicing, editing	1.47	0.000152573	upregulated
943	ENST00000427814	ENSG00000153814	JAZF1	chr7:27830572-27992056(-)	JAZF zinc finger 1	splicing	1.78	0.00253423	downregulated
944	TCONS_00163891	ENSG00000160223	ICOSLG	chr21:44222136-44240542(-)	inducible T-cell co-stimulator ligand	editing	2.23	5.95177e-05	upregulated
945	ENST00000375140	ENSG00000248712	CCDC153	chr11:119190249-119196769(-)	coiled-coil domain containing 153	splicing	2.01	4.73138e-07	upregulated
946	TCONS_00058750	ENSG00000257989	RP1-288H2.2	chr12:52095348-52118341(-)		SMD, splicing, editing	3.27	2.18474e-15	upregulated
947	TCONS_00109424	ENSG00000176974	SHMT1	chr17:18315137-18363536(-)	serine hydroxymethyltransferase 1 (soluble)	SMD	1.59	5.31841e-05	upregulated
948	TCONS_00189329	ENSG00000245958	RP11-33B1.1	chr4:119454769-119565906(+)		splicing, editing	1.54	0.000357639	upregulated
949	TCONS_00190499	ENSG00000129116	PALLD	chr4:168654712-168962111(+)	palladin, cytoskeletal associated protein	SMD	3.34	4.41038e-10	downregulated
950	TCONS_00062678	ENSG00000255398	HCAR3	chr12:122682536-122718072(-)	hydroxycarboxylic acid receptor 3	editing	2.13	0.00036725	upregulated
951	ENST00000357613	ENSG00000166822	TMEM170A	chr16:75443053-75464689(-)	transmembrane protein 170A	SMD, editing	1.48	1.38731e-09	upregulated
952	TCONS_00189321	ENSG00000245958	RP11-33B1.1	chr4:119454738-119565906(+)		splicing, editing	1.54	0.000357639	upregulated
953	ENST00000370563	ENSG00000016602	CLCA4	chr1:86547077-86580754(+)	chloride channel accessory 4	splicing	3.32	1.8229e-09	upregulated
954	TCONS_00225257	ENSG00000159860	FAM115D	chr7:143792187-143836746(+)	family with sequence similarity 115, member D (pseudogene)	splicing	1.75	3.08651e-11	upregulated
955	TCONS_00152102	ENSG00000082438	COBLL1	chr2:164636985-164801356(-)	cordon-bleu WH2 repeat protein-like 1	editing, SMD	1.39	5.96905e-06	upregulated
956	TCONS_00136911	ENSG00000151692	RNF144A	chr2:6917391-7127914(+)	ring finger protein 144A	editing	1.55	6.69866e-08	upregulated
957	TCONS_00022053	ENSG00000236230	RP11-400N13.1	chr1:222138943-222238921(-)		splicing	2.33	2.79014e-05	upregulated
958	TCONS_00138868	ENSG00000143951	WDPCP	chr2:63169702-63466361(+)	WD repeat containing planar cell polarity effector	splicing, SMD	1.49	2.61501e-06	upregulated
959	TCONS_00002817	ENSG00000224592	RP5-884C9.2	chr1:38046982-38122323(+)		editing	1.81	5.00273e-07	downregulated
960	TCONS_00216914	ENSG00000118418	HMGN3	chr6:79187536-79234740(-)	high mobility group nucleosomal binding domain 3	SMD	1.49	9.33241e-05	upregulated
961	TCONS_00222403	ENSG00000127947	PTPN12	chr7:77538028-77645523(+)	protein tyrosine phosphatase, non-receptor type 12	editing	1.45	3.13336e-06	downregulated
962	ENST00000293778	ENSG00000161921	CXCL16	chr17:4733525-4739819(-)	chemokine (C-X-C motif) ligand 16	editing	1.55	5.03581e-05	downregulated
963	ENST00000261523	ENSG00000069667	RORA	chr15:60497263-60627463(-)	RAR-related orphan receptor A	splicing	1.88	5.06176e-06	upregulated
964	TCONS_00053851	ENSG00000151135	TMEM263	chr12:106955718-106987183(+)	transmembrane protein 263	editing	1.52	5.69614e-07	downregulated
965	TCONS_00101146	ENSG00000133030	MPRIP	chr17:17042544-17149669(+)	myosin phosphatase Rho interacting protein	SMD	1.53	8.22695e-05	upregulated
966	TCONS_00185321	ENSG00000072274	TFRC	chr3:196049276-196082189(-)	transferrin receptor	editing	1.78	0.00011585	upregulated
967	ENST00000500779	ENSG00000246859	STARD4-AS1	chr5:111512225-111739726(+)	STARD4 antisense RNA 1	splicing	1.72	0.00132427	downregulated
968	ENST00000612932	ENSG00000274211	SOCS7	chr17:38352244-38405593(+)	suppressor of cytokine signaling 7	SMD	1.63	0.000166224	upregulated
969	TCONS_00235281	ENSG00000156170	NDUFAF6	chr8:94949223-95000481(+)	NADH dehydrogenase (ubiquinone) complex I, assembly factor 6	editing	1.5	8.9267e-05	downregulated
970	TCONS_00008713	ENSG00000116132	PRRX1	chr1:170701801-170748155(+)	paired related homeobox 1	SMD	4.11	1.67937e-11	downregulated
971	ENST00000375587	ENSG00000188312	CENPP	chr9:92325483-92620533(+)	centromere protein P	miRNA	1.48	4.09669e-05	downregulated
972	TCONS_00173145	ENSG00000163686	ABHD6	chr3:58237505-58302502(+)	abhydrolase domain containing 6	editing	1.92	8.13585e-09	upregulated
973	TCONS_00051246	ENSG00000167780	SOAT2	chr12:53112868-53124918(+)	sterol O-acyltransferase 2	editing	2.1	2.90004e-07	upregulated
974	ENST00000263955	ENSG00000081320	STK17B	chr2:196133565-196171575(-)	serine/threonine kinase 17b	SMD, miRNA	1.85	5.60299e-08	downregulated
975	TCONS_00095053	ENSG00000213853	EMP2	chr16:10519818-10580698(-)	epithelial membrane protein 2	splicing, editing	1.57	3.31492e-07	upregulated
976	ENST00000533870	ENSG00000110693	SOX6	chr11:16311244-16341269(-)	SRY (sex determining region Y)-box 6	editing	1.79	2.63579e-09	downregulated
977	TCONS_00226753	ENSG00000164649	CDCA7L	chr7:21872150-21946084(-)	cell division cycle associated 7-like	SMD, editing	2.51	2.23323e-06	upregulated
978	ENST00000513143	ENSG00000162493	PDPN	chr1:13584269-13616564(+)	podoplanin	splicing	4.24	7.33544e-59	downregulated
979	TCONS_00213191	ENSG00000130338	TULP4	chr6:158240851-158513321(+)	tubby like protein 4	SMD, editing	1.55	1.61644e-06	upregulated
980	TCONS_00103259	ENSG00000108352	RAPGEFL1	chr17:40177494-40195699(+)	Rap guanine nucleotide exchange factor (GEF)-like 1	editing	1.6	0.000142781	upregulated
981	ENST00000607772	ENSG00000153721	CNKSR3	chr6:154387503-154510659(-)	CNKSR family member 3	SMD, editing	1.47	9.58738e-05	upregulated
982	TCONS_00018087	ENSG00000266338	NBPF15	chr1:144420702-144461794(-)	neuroblastoma breakpoint family, member 15	splicing, editing	2.12	4.99384e-08	downregulated
983	ENST00000433922	ENSG00000136261	BZW2	chr7:16646133-16706512(+)	basic leucine zipper and W2 domains 2	splicing	1.61	9.0336e-21	upregulated
984	TCONS_00018088	ENSG00000266338	NBPF15	chr1:144420702-144461794(-)	neuroblastoma breakpoint family, member 15	splicing, editing	2.12	4.99384e-08	downregulated
985	TCONS_00174266	ENSG00000178075	GRAMD1C	chr3:113897469-113947661(+)	GRAM domain containing 1C	editing	1.73	3.99981e-06	upregulated
986	TCONS_00225261	ENSG00000159860	FAM115D	chr7:143804611-143836746(+)	family with sequence similarity 115, member D (pseudogene)	splicing	1.75	3.08651e-11	upregulated
987	ENST00000569455	ENSG00000140945	CDH13	chr16:82627038-82723105(+)	cadherin 13	splicing	1.82	0.00434526	downregulated
988	ENST00000536776	ENSG00000205929	C21orf62	chr21:32790673-32807718(-)	chromosome 21 open reading frame 62	SMD	2.18	5.1875e-06	upregulated
989	TCONS_00190276	ENSG00000164124	TMEM144	chr4:158204233-158282835(+)	transmembrane protein 144	editing	1.6	0.000435855	upregulated
990	ENST00000617360	ENSG00000274211	SOCS7	chr17:38352550-38399633(+)	suppressor of cytokine signaling 7	splicing	1.63	0.000166224	upregulated
991	ENST00000302907	ENSG00000170889	RPS9	chr19:54200741-54207647(+)	ribosomal protein S9	miRNA	1.38	3.82599e-05	downregulated
992	ENST00000532572	ENSG00000150687	PRSS23	chr11:86823395-86937819(+)	protease, serine, 23	editing	5.73	8.11338e-26	downregulated
993	TCONS_00012674	ENSG00000180758	GPR157	chr1:9097706-9129170(-)	G protein-coupled receptor 157	editing	1.78	4.22876e-06	upregulated
994	ENST00000543196	ENSG00000139629	GALNT6	chr12:51351246-51383563(-)	polypeptide N-acetylgalactosaminyltransferase 6	SMD, editing	4.53	1.24403e-11	downregulated
995	TCONS_00148450	ENSG00000115355	CCDC88A	chr2:55308002-55419921(-)	coiled-coil domain containing 88A	editing	2.49	4.57318e-15	downregulated
996	ENST00000261486	ENSG00000129595	EPB41L4A	chr5:112162620-112419316(-)	erythrocyte membrane protein band 4.1 like 4A	splicing	1.4	0.000151821	upregulated
